# Supplementary material for: COVID-19 outcomes among adult patients treated with long-term opioid therapy for chronic non-cancer pain in the USA: a retrospective cohort study
Source: PubMed Central journal article supplement — BMJ Open. 2021 Nov 26;11(11):e056436. doi: 10.1136/bmjopen-2021-056436 (PMC8628115; doi:10.1136/bmjopen-2021-056436), 2021-11-26
Supplement: bmjopen-2021-056436.draft_revisions.pdf [file bmjopen-2021-056436.draft_revisions.pdf]

# BMJ Open

BMJ Open is committed to open peer review. As part of this commitment we make the peer review history of every article we publish publicly available.

When an article is published we post the peer reviewers' comments and the authors' responses online. We also post the versions of the paper that were used during peer review. These are the versions that the peer review comments apply to.

The versions of the paper that follow are the versions that were submitted during the peer review process. They are not the versions of record or the final published versions. They should not be cited or distributed as the published version of this manuscript.

BMJ Open is an open access journal and the full, final, typeset and author-corrected version of record of the manuscript is available on our site with no access controls, subscription charges or pay-per-view fees (<http://bmjopen.bmj.com>).

If you have any questions on BMJ Open's open peer review process please email [info.bmjopen@bmj.com](mailto:info.bmjopen@bmj.com)

# BMJ Open

## Assessing COVID-19 Outcomes among Adult Patients with Long-Term Opioid Therapy

|                               |                                                                                                                                                               |
|-------------------------------|---------------------------------------------------------------------------------------------------------------------------------------------------------------|
| Journal:                      | <i>BMJ Open</i>                                                                                                                                               |
| Manuscript ID                 | bmjopen-2021-056436                                                                                                                                           |
| Article Type:                 | Original research                                                                                                                                             |
| Date Submitted by the Author: | 14-Aug-2021                                                                                                                                                   |
| Complete List of Authors:     | Tuan, Wen-Jan; Penn State College of Medicine, Family and Community Medicine<br>Spotts, Hannah; Penn State College of Medicine, Family and Community Medicine |
| Keywords:                     | COVID-19, Public health < INFECTIOUS DISEASES, Quality in health care < HEALTH SERVICES ADMINISTRATION & MANAGEMENT                                           |
|                               |                                                                                                                                                               |

SCHOLARONE™  
Manuscripts

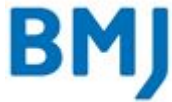

I, the Submitting Author has the right to grant and does grant on behalf of all authors of the Work (as defined in the below author licence), an exclusive licence and/or a non-exclusive licence for contributions from authors who are: i) UK Crown employees; ii) where BMJ has agreed a CC-BY licence shall apply, and/or iii) in accordance with the terms applicable for US Federal Government officers or employees acting as part of their official duties; on a worldwide, perpetual, irrevocable, royalty-free basis to BMJ Publishing Group Ltd ("BMJ") its licensees and where the relevant Journal is co-owned by BMJ to the co-owners of the Journal, to publish the Work in this journal and any other BMJ products and to exploit all rights, as set out in our [licence](#).

The Submitting Author accepts and understands that any supply made under these terms is made by BMJ to the Submitting Author unless you are acting as an employee on behalf of your employer or a postgraduate student of an affiliated institution which is paying any applicable article publishing charge ("APC") for Open Access articles. Where the Submitting Author wishes to make the Work available on an Open Access basis (and intends to pay the relevant APC), the terms of reuse of such Open Access shall be governed by a Creative Commons licence – details of these licences and which [Creative Commons](#) licence will apply to this Work are set out in our licence referred to above.

Other than as permitted in any relevant BMJ Author's Self Archiving Policies, I confirm this Work has not been accepted for publication elsewhere, is not being considered for publication elsewhere and does not duplicate material already published. I confirm all authors consent to publication of this Work and authorise the granting of this licence.

**Title**

Assessing COVID-19 outcomes among adult patients with long-term opioid therapy

**Authors and affiliations**

1st Author (Corresponding Author): Wen-Jan Tuan, DHA, MS, MPH

Affiliation: Departments of Family and Community Medicine, and Public Health Sciences,  
College of Medicine, Pennsylvania State University, Pennsylvania, USA

Address: P.O. Box 850, MC HS72 Hershey, PA 17033

E-mail: wtuan@pennstatehealth.psu.edu

2nd Author: Hannah Spotts

Affiliation: Departments of Family and Community Medicine, College of Medicine,  
Pennsylvania State University, Pennsylvania, USA

Address: P.O. Box 850, MC HS72 Hershey, PA 17033

E-mail: hspotts@pennstatehealth.psu.edu

**Word Count** 2,613 words

**Keywords** COVID-19, Opioids, Electronic Health Records, Cohort Study

### Strengths and Limitations of the Study

- This is one of the few studies utilizing large-scale EHR-based data and propensity score matching approaches to assess the risk of morbidity and mortality from SARS-CoV-2 infection among individuals on long-term opioid therapy, increasing the generalizability and robustness of the study outcomes.
- Study results will help shape the conversations between providers, patients, and public health personnel related to effective prevention and early treatment protocols for patients on long term opioid therapy to reduce the risk and cost burden.
- Individuals on long-term opioid therapy were found more likely to experience severe complications or deaths after being infected by COVID-19; however, the analysis was unable to determine whether people on long-term opioid therapy were more likely to be infected by COVID-19.
- Some patients could receive COVID-19 tests or treatments at healthcare facilities outside of the research data network. The analysis would not include information from these patients, potentially underestimating the risk of negative health outcomes for the target population.
- Patients on long-term opioid therapy could be prescribed opioid medications at different dosage or frequency levels. The study did not assess associations between the dosage of opioid medications and the severity of COVID-19 illness.

## ABSTRACT

### Objective

Patients on long-term opioid therapy (LTOT) are known to have compromised immune systems and respiratory function, both of which make them particularly susceptible to the SARS-CoV-2 virus. The objective of study was to assess the risk of developing severe clinical outcomes among COVID-19 patients on LTOT, compared to those without LTOT.

### Design and data sources

A retrospective cohort design using electronic health records in the TriNetX research database.

### Participants and setting

358,164 individuals diagnosed with COVID-19 in January-December 2020 from 51 U.S. healthcare organizations, including 7,256 in the LTOT cohort and 350,908 in the non-LTOT cohort.

### Results

Patients in LTOT were more likely than non-LTOT patients to be admitted to the hospital (RR=1.61), emergency department (ARR=2.04), and intensive care unit (RR=2.86), and have higher 30-day mortality rates (RR=1.74). There was greater use of both vasopressors (RR=3.36), and mechanical ventilation (RR=5.78), suggesting that long-term opioid users were more likely to get severely ill. LTOT patients also showed increased risk (RRs ranging from 1.91 to 4.53) of severe symptoms, such as cough, fever, hypoxemia, dyspnea, thrombocytopenia, and acute respiratory distress syndrome. Mixed findings were found in the laboratory results. Compared to their non-LTOT counterparts, LTOT patients consistently showed lower systolic pressure (127.1 vs 128.2), diastolic blood pressure (75.1 vs 75.8), and lymphocyte counts (23.6 vs 24.9), and

1  
2  
3 substantial elevation in leukocytes (8.1 vs 7.7), platelets (263.2 vs 257.0), and alkaline  
4  
5 phosphatase concentration (95.4 vs 85.6).  
6

### 7 **Conclusion**

8  
9  
10 COVID-19 patient with LTOT were at significantly higher risk of increased morbidity and  
11  
12 healthcare utilization. Interventions to improve compliance with protective measures may  
13  
14 improve morbidity and decrease healthcare costs for these patients. Prospective studies are  
15  
16 needed to confirm and refine these findings.  
17  
18  
19  
20  
21  
22  
23  
24  
25  
26  
27  
28  
29  
30  
31  
32  
33  
34  
35  
36  
37  
38  
39  
40  
41  
42  
43  
44  
45  
46  
47  
48  
49  
50  
51  
52  
53  
54  
55  
56  
57  
58  
59  
60

## INTRODUCTION

The COVID-19 pandemic, resulting from SARS-CoV-2 infection, has rapidly spread across the United States since early 2020. By the end of 2020, there were over 20 million confirmed cases and 344 thousand deaths reported in the nation (1). This unprecedented upheaval has led to deaths from the novel coronavirus, in addition to deaths caused by the effects of protracted economic stagnation and social disruption. Vulnerable populations with mental illness and substance use disorders have been disproportionately affected (2, 3). As the nation focuses on the COVID-19 pandemic, the opioid crisis has continued to have devastating impacts on communities. Recent statistics shows a 38.4% increase in opioid-related deaths from June 2019 to May 2020 (4). Literature suggests that the opioid crisis has been escalated by a lack of access to drug screening and treatments for opioid use disorders due to care disruption by the COVID-19 pandemic (5). Ongoing opioid addiction prevention efforts have been interrupted by social distancing practices and isolation that can contribute to the misuse of prescription or illicit opioids (3,6).

Research shows that opioids can trigger acute respiratory depression (e.g., hypoventilation and hypoxemia) through the activation of opioid receptors in the brainstem that can lead to respiratory arrest, bradycardia, or death (7). Chronic opioid use also increases the risk of immunosuppression and infections, especially for people on long-term opioid medications (8). These individuals are likely to have cardiopulmonary morbidity, longer hospitalization, and greater overall care costs. With severe COVID-19 infection, patients may also present with clinical signs and symptoms of respiratory depression (9, 10). Approximately 10-15% hospitalized patients for COVID-19 progressed to acute respiratory distress syndrome (11, 12).



1  
2  
3 COVID-19 infection can lead to greater morbidity and mortality for individuals with history of  
4  
5 recurrently using or misusing opioids (3, 13).  
6

7  
8 While the risk of increasing morbidity and mortality from SARS-CoV-2 infection among  
9  
10 individuals with certain health conditions has been identified and incorporated into outcome  
11  
12 prediction models, the relationship between long-term opioid use and SARS-CoV-2-related  
13  
14 morbidity and mortality has not been assessed (14). The likelihood of worsened outcomes in  
15  
16 patients with long-term opioid use and COVID-19 infection may be explained by the  
17  
18 mechanisms of respiratory depression and immunosuppression (15). As a result, COVID-19  
19  
20 patients with a history of long-term opioid therapy may be expected to have more severe health  
21  
22 outcomes, potentially resulting in an increased risk of hospitalization, emergency department  
23  
24 admissions, and time in the intensive care unit (16, 17). Critically ill patients with SARS-CoV-2  
25  
26 were also more likely to be treated with mechanical ventilation and vasopressors (18, 19). Given  
27  
28 the ongoing opioid endemic, more research is urgently needed to investigate long-term opioid  
29  
30 use as a pathway to severe COVID-19. While some studies have assessed COVID-19 outcomes  
31  
32 and opioid use disorders, OUD may be clinically under diagnosed, justifying this study's focus  
33  
34 on operationalizing long-term opioid therapy. This study aims to assess the risk of developing  
35  
36 severe outcomes for COVID-19 patients on long-term opioid therapy, in order to help clinicians  
37  
38 develop more effective care guidelines for treating COVID-19 patients and raise awareness about  
39  
40 the risks of COVID-19 to vulnerable populations on long-term opioid therapy.  
41  
42  
43  
44  
45

## 46 **METHODS**

### 47 **Study design and data collection**

48  
49 The study applied a retrospective cohort design using electronic health records (EHRs)  
50  
51 from 48 healthcare organizations on the research network of the TriNetX database in the United  
52  
53  
54  
55  
56  
57  
58  
59

1  
2  
3 States (Cambridge, MA). TriNetX is a federated health research network that provides access to  
4 continuously updated, de-identified EHR data (demographics, diagnoses, procedures,  
5 medications, laboratory tests, and genomics) of more than 68 million patients from participating  
6 healthcare organizations. The TriNetX platform only uses aggregated counts and statistical  
7 summaries. All the data queries were performed in the TriNetX online portal managed by the  
8 Penn State Clinic and Translational Science Institute. Because there was no protected health  
9 information (PHI) data accessed in the analysis, this research was determined to be exempt from  
10 the Institutional Review Board oversight.  
11  
12  
13  
14  
15  
16  
17  
18  
19  
20

### 21 **Cohort description**

22  
23 The study population consisted of adults (age $\geq$ 18 years) diagnosed of COVID-19  
24 between January 1, 2020 and December 31, 2020, based on the combination of one or more  
25 disease indicators, including ICD-10 diagnosis codes and positive laboratory test results.  
26 Individuals are considered on long-term opioid therapy (LTOT) when they are prescribed with  
27 opioids in 3 or more consecutive months or at least 90 days at outpatient settings (20, 21).  
28 COVID-19 patients meeting the LTOT criteria within 12 months before their infection were  
29 assigned to the LTOT cohort. Individuals with COVID-19 without LTOT were assigned to the  
30 control cohort. The analysis excluded individuals who had cancers (malignant and non-  
31 malignant), or living in nursing home, hospice or palliative care facilities.  
32  
33  
34  
35  
36  
37  
38  
39  
40  
41  
42  
43

### 44 **Outcome indicators**

45  
46 The severity of the COVID-19 infection was assessed through three areas: health service  
47 utilization, clinical presentation, and diagnostic testing. The health service utilization measure  
48 consisted of binary variables (1=yes, 0=no) indicating whether patients were admitted to  
49 emergency department, inpatient hospital, intensive care unit, died within 30 days of  
50  
51  
52  
53  
54  
55  
56  
57  
58  
59  
60

1  
2  
3 hospitalization, placed on mechanical ventilation, or treated with vasopressor medications after  
4 being infected by COVID-19. The clinical presentation measure also comprised of binary  
5 variables (1=yes, 0=no) indicating the presence of severe physical signs or medical complication,  
6 including cough, fever, acute respiratory distress syndrome (ARDS), hypoxemia,  
7 thrombocytopenia, and dyspnea. The diagnostic testing consisted of common biometrics or  
8 laboratory tests serving as severity indicators of COVID-19 infection, such as C-reactive protein,  
9 serum creatinine, and blood urea nitrogen. These tests have also been used to predict the risk of  
10 developing serious illness or deaths in both inpatients and outpatient settings (14, 22).  
11  
12  
13  
14  
15  
16  
17  
18  
19  
20

## 21 **Data Analysis**

22  
23  
24 A number of patient characteristics were considered potential confounding variables,  
25 including age, sex, race/ethnicity, and comorbidities (diabetes, essential hypertension, chronic  
26 pulmonary conditions, cardiovascular diseases, mental health disorders). The study applied a 1:1  
27 propensity score matching (PSM) technique to balance the baseline characteristics between the  
28 comparison and control cohorts and reduce potential selection bias. The matching method was  
29 performed using nearest neighbor algorithms with a caliper width of 0.1 pooled standard  
30 deviation. Outcomes were compared in COVID-19 patients on LTOT and COVID-19 patients  
31 not on LTOT using logistic regression modeling, based on patient cohorts before and after  
32 propensity score matching. Risk ratios were computed and a two-sided alpha of less than 0.05  
33 was defined *a priori* for statistical significance between the two groups. All data queries and  
34 statistical analyses were performed on the TriNetX portal. Detailed data information for  
35 diagnoses and laboratory tests are provided in the Appendix.  
36  
37  
38  
39  
40  
41  
42  
43  
44  
45  
46  
47  
48  
49  
50

## 51 **Patients and public involvement statement**

Patients or the public were not involved in the design, or conduct, or reporting, or dissemination plans of our research.

## RESULTS

### Study population

A total of 358,164 patients diagnosed with COVID-19 from 51 healthcare organizations met the study criteria, including 7,256 individuals in the LTOT cohort and 350,908 in the non-LTOT cohort. Before propensity score matching, the LTOT cohort had a higher average age and a greater percentage of female, white and black patients (Table 1).

**Table 1.** Patient demographics and comorbidities, before and after propensity score matching

| Characteristic                            | Before Propensity Score Matching   |                                         |         | After Propensity Score Matching    |                                       |         | Standardized Mean Difference |
|-------------------------------------------|------------------------------------|-----------------------------------------|---------|------------------------------------|---------------------------------------|---------|------------------------------|
|                                           | Long-term Opioid Therapy (N=7,256) | No Long-term Opioid Therapy (N=350,908) | p-value | Long-term Opioid Therapy (N=7,256) | No Long-term Opioid Therapy (N=7,256) | p-value |                              |
| Age, mean $\pm$ SD                        | 51.9 $\pm$ 17.3                    | 43.1 $\pm$ 17.6                         | <0.01   | 51.9 $\pm$ 17.3                    | 52.4 $\pm$ 17.6                       | 0.09    | 0.028                        |
| Sex                                       |                                    |                                         |         |                                    |                                       |         |                              |
| Female, n (%)                             | 4,438 (61.2)                       | 17,7324 (50.9)                          | <0.01   | 4,433 (61.1)                       | 4,447 (61.3)                          | 0.81    | 0.004                        |
| Male, n (%)                               | 2,818 (38.8)                       | 17,0437 (49)                            | <0.01   | 2,818 (38.9)                       | 2,804 (38.7)                          | 0.81    | 0.004                        |
| Hispanic or Latino                        |                                    |                                         |         |                                    |                                       |         |                              |
| Yes, n (%)                                | 1,057 (14.6)                       | 40,793 (11.7)                           | <0.01   | 1,057 (14.6)                       | 970 (13.4)                            | 0.05    | 0.035                        |
| No, n (%)                                 | 4,602 (63.4)                       | 148,831 (42.8)                          | <0.01   | 4,597 (63.4)                       | 4,571 (63)                            | 0.65    | 0.007                        |
| Race                                      |                                    |                                         |         |                                    |                                       |         |                              |
| White, n (%)                              | 4,588 (63.2)                       | 181,737 (52.2)                          | <0.01   | 4,585 (63.2)                       | 4,566 (63)                            | 0.74    | 0.005                        |
| Black or African American, n (%)          | 1,488 (20.5)                       | 50,942 (14.6)                           | <0.01   | 1,487 (20.5)                       | 1,570 (21.7)                          | 0.09    | 0.028                        |
| Unknown, n (%)                            | 963 (13.3)                         | 103,697 (29.8)                          | <0.01   | 962 (13.3)                         | 913 (12.6)                            | 0.23    | 0.020                        |
| Essential (primary) hypertension, n (%)   | 3,606 (49.7)                       | 34,330 (9.9)                            | <0.01   | 3,601 (49.7)                       | 3,675 (50.7)                          | 0.22    | 0.020                        |
| Chronic lower respiratory diseases, n (%) | 1,928 (26.6)                       | 17,583 (5.1)                            | <0.01   | 1,923 (26.5)                       | 1,923 (26.5)                          | 0.95    | 0.010                        |
| Diabetes mellitus, n (%)                  | 1,989 (27.4)                       | 15,991 (4.6)                            | <0.01   | 1,984 (27.4)                       | 1,924 (26.5)                          | 0.26    | 0.019                        |
| Overweight and obesity, n (%)             | 2,335 (32.2)                       | 19,108 (5.5)                            | <0.01   | 2,330 (32.1)                       | 2,302 (31.7)                          | 0.62    | 0.008                        |
| Ischemic heart diseases, n (%)            | 1,132 (15.6)                       | 6,472 (1.9)                             | <0.01   | 1,127 (15.5)                       | 965 (13.3)                            | <0.01   | 0.064                        |
| Heart failure, n (%)                      | 848 (11.7)                         | 3,495 (1.0)                             | <0.01   | 843 (11.6)                         | 641 (8.8)                             | <0.01   | 0.092                        |
| Nicotine dependence, n (%)                | 335 (4.6)                          | 2,762 (0.8)                             | <0.01   | 334 (4.6)                          | 357 (4.9)                             | 0.37    | 0.010                        |
| Alcohol related disorders, n (%)          | 991 (13.7)                         | 8,274 (2.4)                             | <0.01   | 986 (13.6)                         | 985 (13.6)                            | 0.98    | 0.015                        |

1  
2  
3  
4  
5  
6  
7  
8  
9  
10  
11  
12  
13  
14  
15  
16  
17  
18  
19  
20  
21  
22  
23  
24  
25  
26  
27  
28  
29  
30  
31  
32  
33  
34  
35  
36  
37  
38  
39  
40  
41  
42  
43  
44  
45  
46  
47  
48  
49  
50  
51  
52  
53  
54  
55  
56  
57  
58  
59  
60

There was a greater proportion of males and patients with an unidentified race found in the non-LTOT cohort. Patients in the LTOT cohort consistently had more prevalent comorbidities than their non-LTOT counterpart. Differences in these baseline characteristics were statistically significant between the two cohorts. After propensity score matching, most of these differences became not significant, suggesting the demographic characteristics and comorbid conditions were well-balanced between the LTOT and non-LTOT cohorts. Moreover, absolute standardized differences for all measured baseline characteristics were less than 10%. It further supported that both cohorts had very similar distributions of the observed baseline characteristics and matched samples (23).

### **Healthcare utilization**

In the overall population, COVID-19 patients on LTOT were 3 times ( $p<0.01$ ) more likely to have ED visits and 4.8 times ( $p<0.01$ ) more likely to be hospitalized than individuals without LTOT (see Figure 1). LTOT patients also showed greater likelihoods of receiving intensive care ( $RR=6.8$ ,  $p<0.01$ ), mechanical ventilation ( $RR=6.31$ ,  $p<0.01$ ), and vasopressors ( $RR=10.2$ ,  $p<0.01$ ), compared to their non-LTOT counterparts. After propensity score matching, the adjusted risks of utilizing urgent care resources and extensive life support for LTOT patients were 1.6-5.8 times ( $p<0.01$ ) greater than for non-LTOT patients. The 30-day post-diagnosis mortality rates were found consistently higher in the LTOT cohort, regardless of the PSM adjustment ( $RR=2.97$ ,  $p<0.01$  before PSM;  $RR=1.74$ ,  $p<0.01$  after PSM). Data from before and after propensity score matching can be found in supplemental table 1.

### **Clinical presentation**

In pre-matching analysis, LTOT patients were reported three-fold ( $p<0.01$ ) more likely to have fever and cough than their non-LTOT counterpart (Figure 2). The LTOT cohort also

showed greater risks of developing ARDS (RR=7.05,  $p<0.01$ ), hypoxemia (RR=6.09,  $p<0.01$ ), dyspnea (RR=4.56,  $p<0.01$ ), and thrombocytopenia (RR=7.39,  $p<0.01$ ). In the post PSM analyses, LTOT patients was consistently found more severe medical complications, compared to non-LTOT patients. The adjusted risk ratios ranged from 1.91 for cough and fever, 1.99 for dyspnea, 2.12 for thrombocytopenia, 2.52 for hypoxemia, to 4.53 for ARDS. All differences were statistically significant at the 0.01 level. Data from before and after propensity score matching can be found in supplemental table 2.

### Laboratory tests

Mixed results were found in vital and laboratory tests commonly ordered to assess the severity of COVID-19 in the pre- and post-matching analyses (Table 2). Higher systolic blood pressure (127.1 vs 124.9,  $p<0.01$ ) was observed among LTOT patients before PSM, while LTOT patients consistently showed lower systolic and diastolic blood pressure than non-LTOT patients after matching (127.1 vs 128.2,  $p<0.01$  for systolic BP; 75.1 vs 75.8,  $p<0.01$  for diastolic BP).

**Table 2.** Laboratory test results among COVID-19 patients with LTOT compared to COVID-19 Patients without LTOT

| Type                       | Before Propensity Score Matching     |                                         |         | After Propensity Score Matching      |                                         |         |
|----------------------------|--------------------------------------|-----------------------------------------|---------|--------------------------------------|-----------------------------------------|---------|
|                            | Long-term Opioid Therapy mean±SD (n) | No Long-term Opioid Therapy mean±SD (n) | p-value | Long-term Opioid Therapy mean±SD (n) | No Long-term Opioid Therapy mean±SD (n) | p-value |
| Systolic blood pressure    | 127.11±19.91 (4,442)                 | 124.9±18.61 (92,131)                    | <0.01   | 127.11±19.91 (4,439)                 | 128.24±18.81 (3,389)                    | 0.01    |
| Diastolic blood pressure   | 75.11±12.77 (4,648)                  | 74.85±12.18 (93,677)                    | 0.15    | 75.12±12.77 (4,645)                  | 75.83±12.12 (3,431)                     | 0.01    |
| Leukocytes                 | 8.06±4.77 (4,336)                    | 8.09±31.63 (70,827)                     | 0.95    | 8.06±4.77 (4,332)                    | 7.65±3.31 (2,482)                       | <0.01   |
| Lymphocytes                | 23.55±12.06 (3,421)                  | 25.17±11.77 (62,295)                    | <0.01   | 23.55±12.06 (3,417)                  | 24.93±11.43 (2,143)                     | <0.01   |
| Neutrophils                | 244.85±1161.63 (2719)                | 263.25±1200.96 (42918)                  | 0.44    | 245.29±1162.66 (2714)                | 228.57±1112.11 (1859)                   | 0.63    |
| Platelets                  | 263.2±98.31 (4363)                   | 263.7±91.51 (70562)                     | 0.73    | 263.2±98.35 (4358)                   | 257.01±85 (2527)                        | <0.01   |
| Serum creatinine           | 1.28±3.4 (4469)                      | 1.02±2.23 (69545)                       | <0.01   | 1.28±3.4 (4464)                      | 1.18±3.05 (2844)                        | 0.19    |
| Blood urea nitrogen        | 18.58±14.33 (3608)                   | 17.09±12.99 (54324)                     | <0.01   | 18.58±14.33 (3603)                   | 18.11±13.56 (2501)                      | 0.20    |
| Lactate dehydrogenase      | 409.48±788.76 (1041)                 | 377.74±517.6 (14802)                    | 0.07    | 408.51±788.51 (1040)                 | 405.93±552.87 (444)                     | 0.95    |
| Alanine aminotransferase   | 39.1±208.05 (3866)                   | 43.01±160.16 (58154)                    | 0.15    | 39.13±208.18 (3861)                  | 30.47±42.52 (2366)                      | 0.05    |
| Aspartate aminotransferase | 56.16±736.62 (3859)                  | 44.18±390.27 (56702)                    | 0.09    | 56.2±737.1 (3854)                    | 31.16±114.74 (2309)                     | 0.11    |

|                      |                          |                           |       |                     |                      |       |
|----------------------|--------------------------|---------------------------|-------|---------------------|----------------------|-------|
| Alkaline phosphatase | 95.42±64.24 (3782)       | 80.69±50.54 (55580)       | <0.01 | 95.36±64.16 (3777)  | 85.58±52.22 (2306)   | <0.01 |
| Serum ferritin       | 547.04±1076.62<br>(1464) | 769.47±2694.05<br>(18833) | <0.01 | 547.7±1077.2 (1462) | 634.17±1642.94 (716) | 0.14  |
| Troponin I           | 0.38±3.69 (690)          | 0.55±6.87 (5506)          | 0.53  | 0.38±3.7 (687)      | 0.83±9.59 (198)      | 0.32  |
| C-reactive protein   | 44.31±65.45 (1670)       | 37.2±57.57 (22008)        | <0.01 | 44.24±65.45 (1668)  | 37.19±58.33 (700)    | 0.01  |

Measurement unit: leukocytes in 1000/microliter; platelets in number/volume; serum creatinine in mg/dL; C-reactive protein (CRP) in mg/L; lymphocytes, neutrophils in cells/ $\mu$ L; blood urea nitrogen (BUN) in mg/dL; serum ferritin, troponin I in ng/mL; lactate dehydrogenase (LDH), alanine aminotransferase (ALT), aspartate aminotransferase (AST), alkaline phosphatase (ALP) in units/liter

The pre-matching analysis reported that LTOT patients had a greater concentration of serum creatinine (1.3 vs 1.0,  $p<0.01$ ) and blood urea nitrogen (18.6 vs 17.1,  $p<0.01$ ) and a lower concentration of serum ferritin (547.0 vs 769.5,  $p<0.01$ ), but differences in these lab results were not significantly different between the two cohorts in the post-matching analysis. Despite no difference found in leukocytes and platelets before PSM, substantial elevation in leukocytes (8.1 vs 7.7,  $p<0.01$ ) and platelets (263.2 vs 257.0,  $p<0.01$ ) were observed in LTOT patients after PSM. Moreover, in both the pre- and post-matching analyses, LTOT patients showed lower lymphocyte counts (23.6 vs 25.2,  $p<0.01$  before PSM; 23.6 vs 2.9,  $p<0.01$  after PSM), while they had a greater level of alkaline phosphatase concentration than their non-LTOT counterparts (95.4 vs 90.7,  $p<0.01$  before PSM; 95.4 vs 85.6,  $p<0.01$  after PSM).

## DISCUSSION

The COVID-19 pandemic has presented persistent public health challenges, particularly among populations with a history of substance use and mental health conditions. Amidst the pandemic, the crisis of the opioid epidemic has continued to rise and strain healthcare resources, society productivity and general well-being. While the literature has identified the pernicious effects of COVID-19 on many clinical findings and laboratory tests, there has been little knowledge about the outcomes and presentation of COVID-19 among patients on long-term opioid therapy. Given the magnitude of both crises, lack of understanding of the relationship

1  
2  
3 between COVID-19 and opioid use represents a gap that can disadvantage clinicians when  
4  
5 considering prevention and early treatment among individuals in this population.  
6

7  
8 This study revealed that COVID-19 patients with a history of long-term opioid therapy  
9  
10 were more likely to be admitted to the hospital, emergency department, and intensive care unit,  
11  
12 and have higher 30-day mortality rates. Additionally, there was greater use of both vasopressors  
13  
14 and mechanical ventilation, suggesting that long-term opioid users are more likely to get severely  
15  
16 ill from COVID-19. This aligns with the existing literature that found the need for respiratory  
17  
18 support in the ICU among COVID-19 patients struggling with hypoxemia (24). Previous studies  
19  
20 have also shown more hospitalizations, ICU admissions, and death among COVID-19 patients  
21  
22 with any form of substance use disorder, with particularly strong associations among patients  
23  
24 with opioid use disorders (25, 26, 27). The cohort of patients on long term opioid therapy in this  
25  
26 study had increased risk of severe symptoms such as cough, fever, hypoxemia, dyspnea,  
27  
28 thrombocytopenia, and acute respiratory distress syndrome (ARDS). There is significant overlap  
29  
30 between the ways in which the pathophysiology of COVID-19 and the interactions of opioids  
31  
32 with their mu-receptors mediate both respiratory damage and immunosuppression (10, 24, 28).  
33  
34 As such, opioids decrease cytokine and leukocyte recruitment, compromising the innate and  
35  
36 adaptive immune pathways, making individuals more susceptible to infection at the same time as  
37  
38 opioid-induced respiratory depression amplifies hypoxemia in COVID-19 (8, 15). While there is  
39  
40 conflicting literature on the direct effects of opioids on cardiovascular events such as myocardial  
41  
42 infarction, some research has demonstrated how cardiorespiratory co-morbidities play a role in  
43  
44 the increased risk of severe outcomes among COVID-19 patients on long term opioid therapy  
45  
46  
47  
48  
49  
50  
51 (27, 29).  
52  
53  
54  
55  
56  
57  
58  
59  
60



1  
2  
3 Several studies have examined the prognostic value of various laboratory tests in the  
4 setting of severe COVID-19. Our analysis showed that both systolic and diastolic blood pressure  
5 was lower among patients on opioid therapy, though this difference was not clinically significant  
6 between the two groups. There were significant differences in leukocytes, lymphocytes, platelets,  
7 ALT, alkaline phosphatase, and C-reactive protein in our results after propensity score matching.  
8  
9 Previous studies have shown that COVID-19 patients have demonstrated some degree of  
10 lymphopenia with or without leukopenia, alterations in neutrophil to lymphocyte ratios, mild  
11 decreases in platelets, and elevations in inflammatory markers such as C-reactive protein and  
12 erythrocyte sedimentation rate (10, 30). In patients on prescription opioids, research has  
13 documented some elevations in C-reactive protein and altered platelet, lymphocyte, and  
14 monocyte ratios (31, 32). Elevations in kidney, liver, and other systemic organ lab results may  
15 indicate the effects of COVID-19 on causing multi-system organ damage or failure (10, 27).  
16  
17  
18  
19  
20  
21  
22  
23  
24  
25  
26  
27  
28  
29

30  
31 In summary, COVID -19 patients with a history of long term opioid therapy were more  
32 likely to experience respiratory distress, inflammation, and clinical symptoms of a weakening  
33 immune response. In addition, they often required higher rates of hospitalization, admission to  
34 intensive care units, and use of clinical support measures such as mechanical ventilation. These  
35 results suggest that there is a possible increased burden on the healthcare system, with regards to  
36 cost and utilization of services, for long term opioid therapy patients without effective prevention  
37 or when appropriate treatment is not initiated early in the course of disease. It is important for  
38 clinicians to recognize these risks within this patient population as they deal with the ongoing  
39 challenges of care in the context of COVID-19.  
40  
41  
42  
43  
44  
45  
46  
47  
48  
49  
50

## 51 **Limitations**

52  
53  
54  
55  
56  
57  
58  
59  
60

1  
2  
3 This study has several limitations to note and consider. First, there is a possibility that  
4 patients with long term opioid therapy captured in the research network received their COVID-  
5 19 diagnosis or testing at facilities outside of the participating networks, and therefore would not  
6 have been included in the analysis. We chose to operationalize long-term opioid therapy as  
7 mentioned in the Methods section, but there is a possibility that patients with a history of chronic  
8 opioid use do not meet this specific definition and therefore were not included. There are several  
9 socioeconomic factors that are not available in the database, such as type of insurance, education,  
10 and urban or rural residence that could act as confounders in the statistical analysis. However,  
11 the propensity score matching was able to construct comparable cohorts in order to best  
12 determine the effects of long term opioid therapy on the selected outcomes.  
13  
14  
15  
16  
17  
18  
19  
20  
21  
22  
23  
24  
25  
26  
27

## 28 **CONCLUSION**

29  
30 The COVID-19 pandemic has created challenges and barriers preventing people from  
31 accessing addiction treatments. This study using a national research database demonstrates that  
32 COVID-19 patients on long-term opioid therapy are at higher risk of serious ill, hospitalization,  
33 and intensive care due to prolonged inflammation, acute respiratory distress, and ineffective  
34 immune responses. Efforts to decrease SARS-CoV-2 infection rates in persons on long-term  
35 opioid therapy through personal behavior and vaccination are critical to decrease morbidity given  
36 these patients' increased risk of cough, fever, ARDS, hypoxemia, dyspnea, and  
37 thrombocytopenia on presentation. While prospective studies are needed to confirm and further  
38 refine these results, clinicians would be prudent to persistently engage their long-term opioid  
39 patients to optimize their compliance with COVID-19 protective behaviors, including  
40 vaccination.  
41  
42  
43  
44  
45  
46  
47  
48  
49  
50  
51  
52  
53  
54  
55  
56  
57  
58  
59  
60

### **Contributors**

All authors were involved in revisions, read and approved the final manuscript. WJT contributed to the planning and design of the work, literature review, data analysis, interpretation, and writing the manuscript. HS contributed to literature review, data analysis, interpretation, and writing the manuscript.

### **Funding**

The author(s) received no financial support for the research, authorship, and/or publication of this article. The work was conducted through the medical scholar research program of the Penn State Department of Family and Community Medicine.

### **Competing interests**

None declared.

### **Ethic approval**

All the data queries were performed in the TriNetX online portal managed by the Penn State Clinic and Translational Science Institute. Because there was no protected health information data accessed in the analysis, this research was determined to be exempt from the Institutional Review Board oversight

### **Patient and public involvement**

Patients and the public were not involved in the design, conduct, reporting, or dissemination of the study.

### **Provenance and peer review**

Not commissioned; externally peer reviewed.

### **Data availability statement**

No data are available.

**Figure 1.** Healthcare utilization among COVID-19 patients with LTOT compared to COVID-19 Patients without LTOT

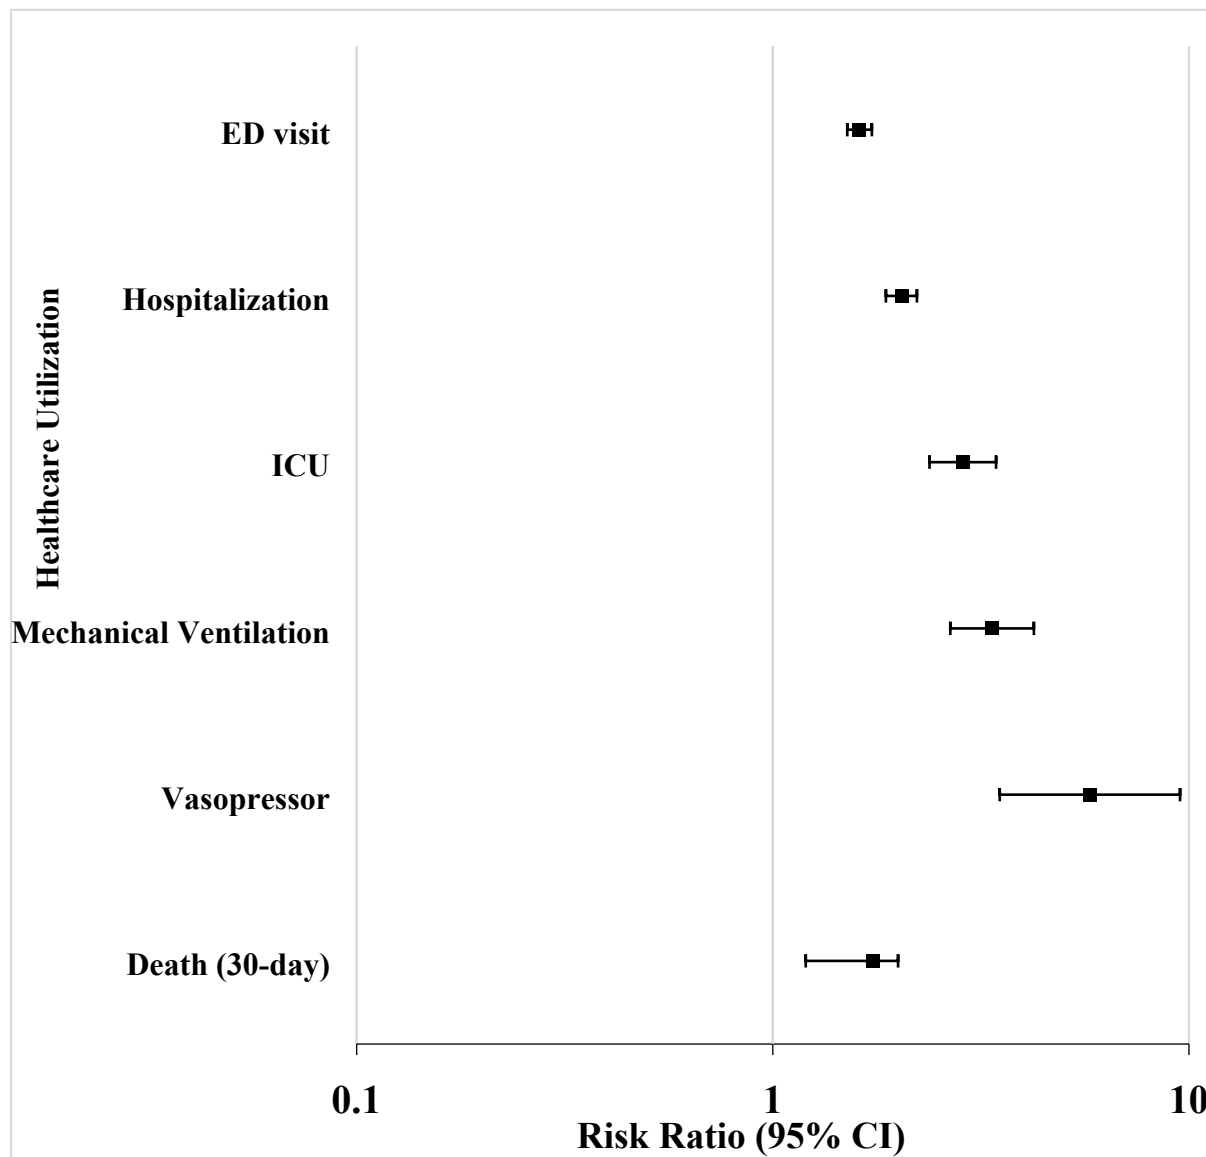

**Figure 2.** Clinical presentation among COVID-19 patients with LTOT compared to COVID-19 Patients without LTOT

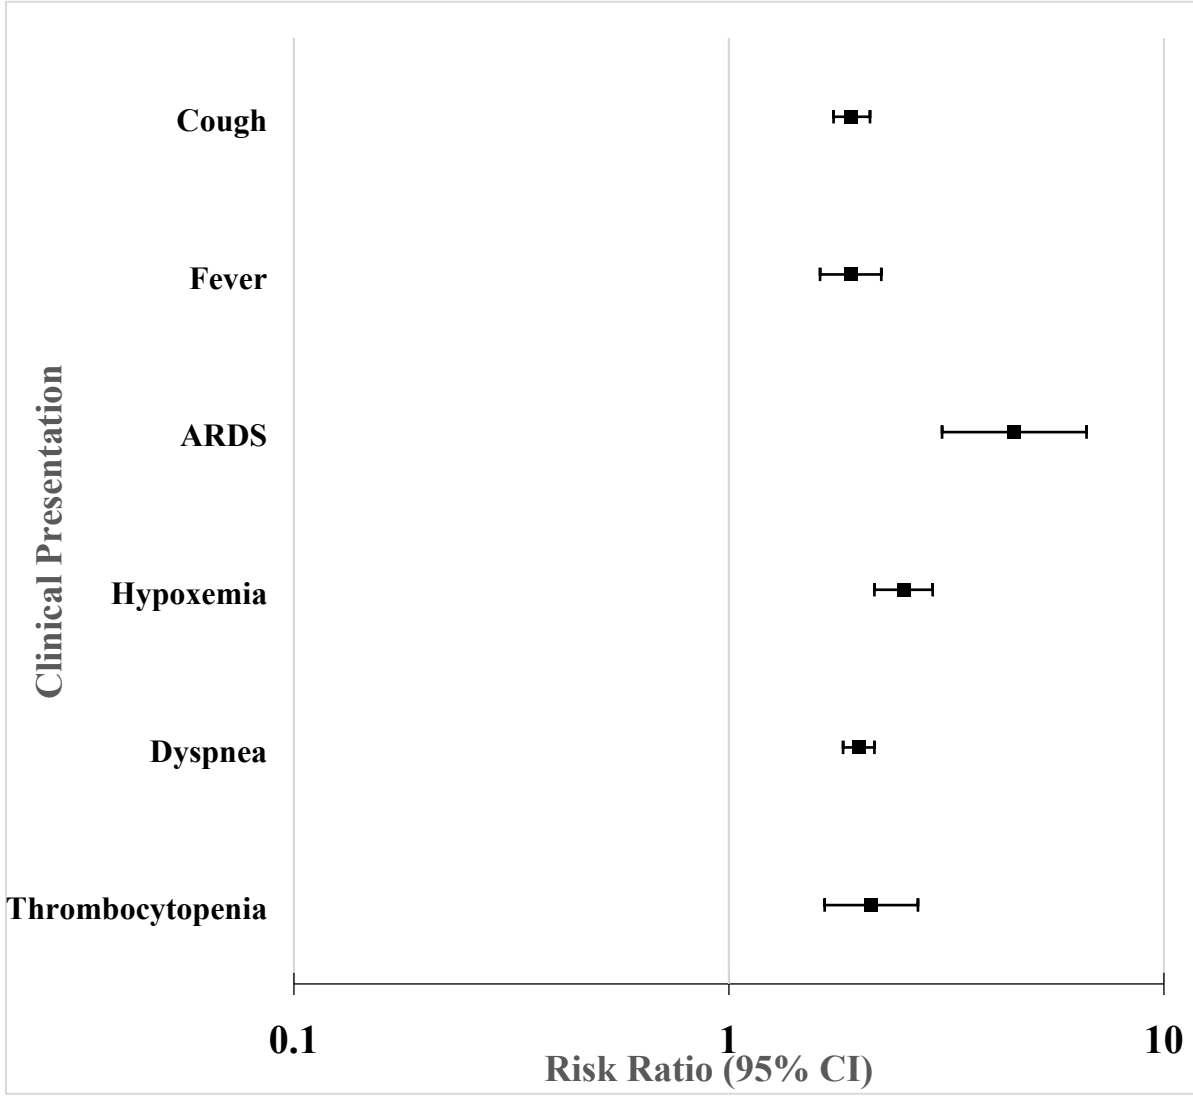

## REFERENCES

1. Centers for Disease Control and Prevention. CDC COVID data tracker. Available from [https://covid.cdc.gov/covid-data-tracker/#trends\\_totalandratescases](https://covid.cdc.gov/covid-data-tracker/#trends_totalandratescases) [Access on March 5, 2021]
2. Melamed OC, Hauck TS, Buckley L, *et al.* COVID-19 and persons with substance use disorders: inequities and mitigation strategies. *Substance Abuse* 2020;**41**:286-291.doi:10.1080/08897077.2020.1784363
3. Ornell F, Moura HF, Scherer JN, *et al.* The COVID-19 pandemic and its impact on substance use: implications for prevention and treatment. *Psychiatry Research* 2020;**289**:113096.doi:10.1016/j.psychres.2020.113096
4. Centers for Disease Control and Prevention. Overdose deaths accelerating during COVID-19. Available from <https://www.cdc.gov/media/releases/2020/p1218-overdose-deaths-covid-19.html> [Access on Feb 17, 2021]
5. Khatri UG, Perrone J. Opioid use disorder and COVID-19: crashing of the crises. *J Addict Med* 2020;**14**:e6-e7.doi:10.1097/ADM.0000000000000684
5. Silva MJ, Kelly Z. The escalation of the opioid epidemic due to COVID-19 and resulting lessons about treatment alternatives. *Am J Manag Care* 2020;**26**:e202-e204.doi:10.37765/ajmc.2020.43386
6. Dahan A, Aarts L, Smith TW. Incidence, reversal, and prevention of opioid-induced respiratory depression. *Anesthesiology* 2020;**112**:226-238.doi:10.1097/ALN.0b013e3181c38c25
7. Wiese AD, Grijalva CG. The use of prescribed opioid analgesics & the risk of serious infections. *Future Microbiology*, 2018;**13**:849-852.doi:10.2217/fmb-2018-0101

- 1  
2  
3 8. Grasselli G, Tonetti T, Protti A, *et al.* Pathophysiology of COVID-19-associated acute  
4 respiratory distress syndrome: a multicentre prospective observational study. *Respiratory*  
5  
6 *Medicine* 2020;**8**:1201-1208.doi:10.1016/S2213-2600(20)30370-2  
7  
8  
9  
10 9. Ragab D, Salah Eldin H, Taeimah M, *et al.* The COVID-19 cytokine storm; what we know so  
11 far. *Frontiers in immunology* 2020;**11**:1446.doi:10.3389/fimmu.2020.01446  
12  
13  
14 10. El-Solh AA, Meduri UG, Lawson Y, *et al.* Clinical course and outcome of COVID-19 acute  
15 respiratory distress syndrome: data from a national repository. *J Intensive Care Med*  
16  
17 2021;**36**:664-672.doi:10.1177/0885066621994476  
18  
19  
20  
21 11. Matthay MA, Aldrich JM, Gotts JE. Treatment for severe acute respiratory distress syndrome  
22 from COVID-19. *The Lancet. Respiratory Medicine* 2020;**8**:433–434.doi:10.1016/S2213-  
23  
24 2600(20)30127-2  
25  
26  
27  
28 12. Volkow ND. Collision of the COVID-19 and addiction epidemics. *Ann Intern*  
29 *Med* 2020;**173**:61-62.doi:10.7326/M20-1212  
30  
31  
32  
33 13. Ebell MH, Cai X, Lennon R, *et al.* Development and validation of the COVID-NoLab and  
34 COVID-SimpleLab risk scores for prognosis in 6 US health systems. *J Am Board Fam*  
35 *Med* 2021;**34**(Suppl):S127-S135.doi:10.3122/jabfm.2021.S1.200464  
36  
37  
38  
39 14. Schimmel J, Manini AF. Opioid use disorder and COVID-19: biological plausibility for  
40 worsened outcomes. *Substance Use & Misuse* 2020;**55**:1900-  
41  
42 1901.doi:10.1080/10826084.2020.1791184  
43  
44  
45  
46 15. Bentivegna M, Hulme C, Ebell MH. Primary care relevant risk factors for adverse outcomes  
47 in patients with COVID-19 infection: a systematic review. *J Am Board Fam Med* 2021;**34**(Feb  
48  
49 Suppl):S113-S126.doi: 10.3122/jabfm.2021.S1.200429  
50  
51  
52  
53  
54  
55  
56  
57  
58  
59  
60

16. Bravata DM, Perkins AJ, Myers LJ, *et al.* Association of intensive care unit patient load and demand with mortality rates in US Department of Veterans Affairs hospitals during the COVID-19 pandemic. *JAMA Netw Open* 2021;**4**:e2034266. doi:10.1001/jamanetworkopen.2020.34266
17. Ioannou GN, Locke E, Green P, *et al.* Risk factors for hospitalization, mechanical ventilation, or death among 10131 US veterans with SARS-CoV-2 infection. *JAMA Netw Open* 2020;**3**:e2022310. doi:10.1001/jamanetworkopen.2020.22310
18. Poston JT, Patel BK, Davis AM. Management of critically ill adults with COVID-19. *JAMA* 2020;**323**:1839-1841. doi:10.1001/jama.2020.4914
19. Von Korff M, Saunders K, Thomas Ray G, *et al.* De facto long-term opioid therapy for noncancer pain. *Clin J Pain* 2008;**24**:521-527. doi:10.1097/AJP.0b013e318169d03b
20. Von Korff M, Kolodny A, Deyo RA, *et al.* Long-term opioid therapy reconsidered. *Ann Intern Med* 2011;**155**:325-328. doi:10.7326/0003-4819-155-5-201109060-00011
21. Galloway JB, Norton S, Barker RD, *et al.* A clinical risk score to identify patients with COVID-19 at high risk of critical care admission or death: an observational cohort study. *J Infect* 2020;**81**:282-288. doi:10.1016/j.jinf.2020.05.064
22. Morgan CJ. Reducing bias using propensity score matching. *J Nucl Cardiol* 2018;**25**:404-406. doi: 10.1007/s12350-017-1012-y
23. Grasselli G, Zangrillo A, Zanella A, *et al.* Baseline characteristics and outcomes of 1591 patients infected with SARS-CoV-2 admitted to ICUs of the Lombardy region, Italy. *JAMA* 2020;**323**:1574-1581. doi:10.1001/jama.2020.5394
24. Wang QQ, Kaelber DC, Xu R, *et al.* COVID-19 risk and outcomes in patients with substance use disorders: analyses from electronic health records in the United States. *Molecular Psychiatry* 2021;**26**:30-39. doi:10.1038/s41380-020-00880-7



- 1  
2  
3 25. Allen B, El Shahawy O, Rogers ES, *et al.* Association of substance use disorders and drug  
4 overdose with adverse COVID-19 outcomes in New York City: January-October 2020. *J Public*  
5  
6 *Health (Oxf)* 2020;fdaa241.doi:10.1093/pubmed/fdaa241  
7  
8  
9  
10 26. Baillargeon J, Polychronopoulou E, Kuo YF, *et al.* The Impact of Substance Use Disorder on  
11  
12 COVID-19 Outcomes. *Psychiatric Services* 2021;**72**:578-581.doi:10.1176/appi.ps.202000534  
13  
14  
15 27. Algera MH, Kamp J, van der Schrier R, *et al.* Opioid-induced respiratory depression in  
16  
17 humans: a review of pharmacokinetic-pharmacodynamic modelling of reversal. *Br J Anaesth*  
18  
19 2019;**122**:e168-e179.doi:10.1016/j.bja.2018.12.023  
20  
21  
22 28. Ogungbe O, Akil L, Ahmad HA. Exploring unconventional risk-factors for cardiovascular  
23  
24 diseases: has opioid therapy been overlooked? *Int J Environ Res Public*  
25  
26 *Health* 2019;**16**:2564.doi:10.3390/ijerph16142564  
27  
28  
29 29. Pourbagheri-Sigaroodi A, Bashash D, Fateh, F. *et al.* Laboratory findings in COVID-19  
30  
31 diagnosis and prognosis. *Clin Chim Acta* 2020;**510**:475-482.doi:10.1016/j.cca.2020.08.019  
32  
33  
34 30. Chopan M, Littenberg B. C-reactive protein and prescription opioid use. *Journal of Nature*  
35  
36 *and Science* 2015;**1**:122.  
37  
38 31. Orum MH, Kara MZ, Egilmez OB, *et al.* Complete blood count alterations due to the opioid  
39  
40 use: what about the lymphocyte-related ratios, especially in monocyte to lymphocyte ratio and  
41  
42 platelet to lymphocyte ratio? *J Immunoassay Immunochem* 2018;**39**:365-  
43  
44 376.doi:10.1080/15321819.2018.1460272  
45  
46  
47  
48  
49  
50  
51  
52  
53  
54  
55  
56  
57  
58  
59  
60

## Supplemental tables

**Supplemental Table 1.** Healthcare utilization among COVID-19 patients on long-term opioid therapy compared to COVID-19 patients not on long-term opioid therapy

| Utilization     | Before Propensity Score Matching          |                                                |                     | After Propensity Score Matching           |                                              |                     |
|-----------------|-------------------------------------------|------------------------------------------------|---------------------|-------------------------------------------|----------------------------------------------|---------------------|
|                 | Long-term Opioid Therapy (N=7,256), n (%) | No Long-term Opioid Therapy (N=350,908), n (%) | Risk Ratio (95% CI) | Long-term Opioid Therapy (N=7,256), n (%) | No Long-term Opioid Therapy (N=7,256), n (%) | Risk Ratio (95% CI) |
| ED visit        | 1,797 (24.77)                             | 28,378 (8.15)                                  | 3.04 (2.91,3.17)    | 1,794 (24.74)                             | 1,112 (15.34)                                | 1.61 (1.51,1.73)    |
| Hospitalization | 1,362 (18.77)                             | 13,658 (3.92)                                  | 4.78 (4.55,5.03)    | 1359 (18.74)                              | 667 (9.2)                                    | 2.04 (1.87,2.22)    |
| ICU             | 424 (5.84)                                | 2,975 (0.85)                                   | 6.84 (6.19,7.55)    | 423 (5.83)                                | 148 (2.04)                                   | 2.86 (2.38,3.44)    |
| Mechanical Vent | 308 (4.24)                                | 2,341 (0.67)                                   | 6.31 (5.62,7.09)    | 306 (4.22)                                | 91 (1.25)                                    | 3.36 (2.67,4.24)    |
| Vasopressor     | 104 (1.43)                                | 488 (0.14)                                     | 10.22 (8.28,12.62)  | 104 (1.43)                                | 18 (0.25)                                    | 5.78 (3.51,9.52)    |
| Death (30-day)  | 257 (3.51)                                | 4,112 (1.18)                                   | 2.97 (2.64, 3.38)   | 257 (3.51)                                | 149 (2.06)                                   | 1.74 (1.58, 2.14)   |

N: total number of patients in the cohort; n: number of patients with the health outcome; 95% CI: 95% confidence intervals

1  
2  
3  
4  
5  
6  
7  
8  
9  
10  
11  
12  
13  
14  
15  
16  
17  
18  
19  
20  
21  
22  
23  
24  
25  
26  
27  
28  
29  
30  
31  
32  
33  
34  
35  
36  
37  
38  
39  
40  
41  
42  
43  
44  
45  
46  
47

**Supplemental Table 2.** Clinical presentation among COVID-19 patients on long-term opioid therapy compared to COVID-19 patients not on long-term opioid therapy

| Clinical Presentation | Before Propensity Score Matching          |                                                |                     | After Propensity Score Matching           |                                              |                     |
|-----------------------|-------------------------------------------|------------------------------------------------|---------------------|-------------------------------------------|----------------------------------------------|---------------------|
|                       | Long-term Opioid Therapy (N=7,256), n (%) | No Long-term Opioid Therapy (N=350,908), n (%) | Risk Ratio (95% CI) | Long-term Opioid Therapy (N=7,256), n (%) | No Long-term Opioid Therapy (N=7,256), n (%) | Risk Ratio (95% CI) |
| Cough                 | 1,083 (14.93)                             | 13,940 (4)                                     | 3.73 (3.52,3.95)    | 1,080 (14.89)                             | 564 (7.78)                                   | 1.91 (1.74,2.11)    |
| Fever                 | 415 (5.72)                                | 5,324 (1.53)                                   | 3.74 (3.39,4.12)    | 414 (5.71)                                | 217 (2.99)                                   | 1.91 (1.62,2.24)    |
| ARDS                  | 146 (2.01)                                | 994 (0.29)                                     | 7.05 (5.93,8.37)    | 145 (2)                                   | 32 (0.44)                                    | 4.53 (3.09,6.64)    |
| Hypoxemia             | 539 (7.43)                                | 4,244 (1.22)                                   | 6.09 (5.59,6.64)    | 537 (7.41)                                | 213 (2.94)                                   | 2.52 (2.16,2.94)    |
| Dyspnea               | 1,435 (19.78)                             | 15,109 (4.34)                                  | 4.56 (4.34,4.78)    | 1,431 (19.74)                             | 720 (9.93)                                   | 1.99 (1.83,2.16)    |
| Thrombocytopenia      | 194 (2.67)                                | 1,260 (0.36)                                   | 7.39 (6.36,8.58)    | 193 (2.66)                                | 91 (1.25)                                    | 2.12 (1.66,2.72)    |

N: total number of patients in the cohort; n: number of patients with the health outcome; 95% CI: 95% confidence intervals

1  
2  
3  
4  
5  
6  
7  
8  
9  
10  
11  
12  
13  
14  
15  
16  
17  
18  
19  
20  
21  
22  
23  
24  
25  
26  
27  
28  
29  
30  
31  
32  
33  
34  
35  
36  
37  
38  
39  
40  
41  
42  
43  
44  
45  
46  
47  
48  
49  
50  
51  
52  
53  
54  
55  
56  
57  
58  
59  
60

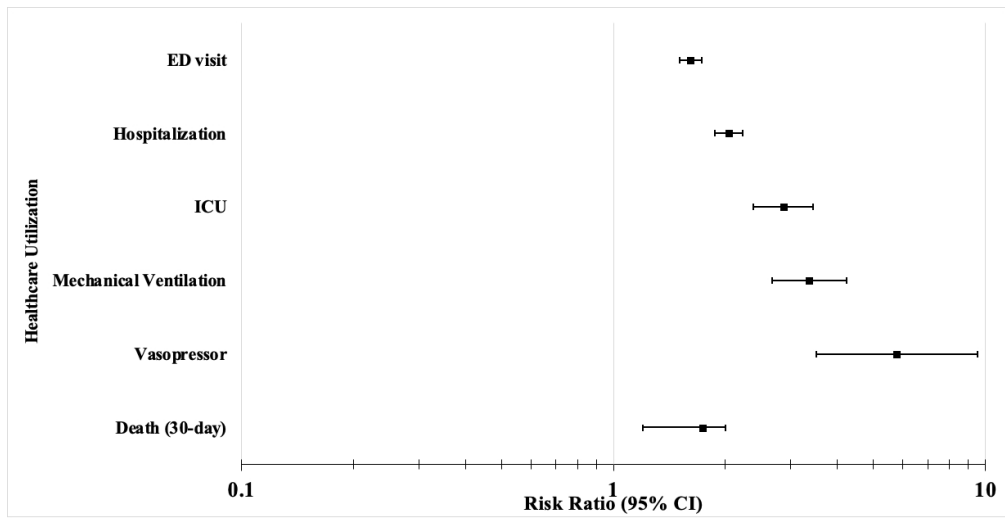

263x134mm (118 x 118 DPI)

1  
2  
3  
4  
5  
6  
7  
8  
9  
10  
11  
12  
13  
14  
15  
16  
17  
18  
19  
20  
21  
22  
23  
24  
25  
26  
27  
28  
29  
30  
31  
32  
33  
34  
35  
36  
37  
38  
39  
40  
41  
42  
43  
44  
45  
46  
47  
48  
49  
50  
51  
52  
53  
54  
55  
56  
57  
58  
59  
60

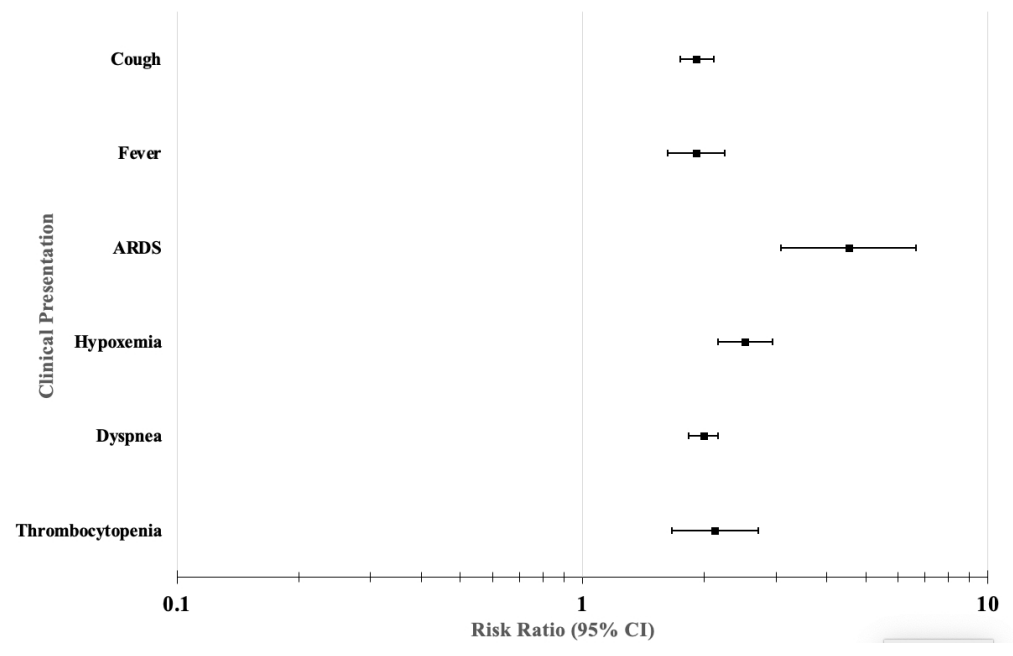

256x167mm (118 x 118 DPI)

## Supplemental tables

## Supplemental Table 1.

Healthcare utilization among COVID-19 patients on long-term opioid therapy compared to COVID-19 patients not on long-term opioid therapy

| Utilization     | Before Propensity Score Matching          |                                                |                     | After Propensity Score Matching           |                                              |                     |
|-----------------|-------------------------------------------|------------------------------------------------|---------------------|-------------------------------------------|----------------------------------------------|---------------------|
|                 | Long-term Opioid Therapy (N=7,256), n (%) | No Long-term Opioid Therapy (N=350,908), n (%) | Risk Ratio (95% CI) | Long-term Opioid Therapy (N=7,256), n (%) | No Long-term Opioid Therapy (N=7,256), n (%) | Risk Ratio (95% CI) |
| ED visit        | 1,797 (24.77)                             | 28,378 (8.15)                                  | 3.04 (2.91,3.17)    | 1,794 (24.74)                             | 1,112 (15.34)                                | 1.61 (1.51,1.73)    |
| Hospitalization | 1,362 (18.77)                             | 13,658 (3.92)                                  | 4.78 (4.55,5.03)    | 1359 (18.74)                              | 667 (9.2)                                    | 2.04 (1.87,2.22)    |
| ICU             | 424 (5.84)                                | 2,975 (0.85)                                   | 6.84 (6.19,7.55)    | 423 (5.83)                                | 148 (2.04)                                   | 2.86 (2.38,3.44)    |
| Mechanical Vent | 308 (4.24)                                | 2,341 (0.67)                                   | 6.31 (5.62,7.09)    | 306 (4.22)                                | 91 (1.25)                                    | 3.36 (2.67,4.24)    |
| Vasopressor     | 104 (1.43)                                | 488 (0.14)                                     | 10.22 (8.28,12.62)  | 104 (1.43)                                | 18 (0.25)                                    | 5.78 (3.51,9.52)    |
| Death (30-day)  | 257 (3.51)                                | 4,112 (1.18)                                   | 2.97 (2.64, 3.38)   | 257 (3.51)                                | 149 (2.06)                                   | 1.74 (1.58, 2.14)   |

N: total number of patients in the cohort; n: number of patients with the health outcome; 95% CI: 95% confidence intervals

1  
2  
3  
4  
5  
6  
7  
8  
9  
10  
11  
12  
13  
14  
15  
16  
17  
18  
19  
20  
21  
22  
23  
24  
25  
26  
27  
28  
29  
30  
31  
32  
33  
34  
35  
36  
37  
38  
39  
40  
41  
42  
43  
44  
45  
46  
47

**Supplemental Table 2.**

Clinical presentation among COVID-19 patients on long-term opioid therapy compared to COVID-19 patients not on long-term opioid therapy

| Clinical Presentation | Before Propensity Score Matching          |                                                |                     | After Propensity Score Matching           |                                              |                     |
|-----------------------|-------------------------------------------|------------------------------------------------|---------------------|-------------------------------------------|----------------------------------------------|---------------------|
|                       | Long-term Opioid Therapy (N=7,256), n (%) | No Long-term Opioid Therapy (N=350,908), n (%) | Risk Ratio (95% CI) | Long-term Opioid Therapy (N=7,256), n (%) | No Long-term Opioid Therapy (N=7,256), n (%) | Risk Ratio (95% CI) |
| Cough                 | 1,083 (14.93)                             | 13,940 (4)                                     | 3.73 (3.52,3.95)    | 1,080 (14.89)                             | 564 (7.78)                                   | 1.91 (1.74,2.11)    |
| Fever                 | 415 (5.72)                                | 5,324 (1.53)                                   | 3.74 (3.39,4.12)    | 414 (5.71)                                | 217 (2.99)                                   | 1.91 (1.62,2.24)    |
| ARDS                  | 146 (2.01)                                | 994 (0.29)                                     | 7.05 (5.93,8.37)    | 145 (2)                                   | 32 (0.44)                                    | 4.53 (3.09,6.64)    |
| Hypoxemia             | 539 (7.43)                                | 4,244 (1.22)                                   | 6.09 (5.59,6.64)    | 537 (7.41)                                | 213 (2.94)                                   | 2.52 (2.16,2.94)    |
| Dyspnea               | 1,435 (19.78)                             | 15,109 (4.34)                                  | 4.56 (4.34,4.78)    | 1,431 (19.74)                             | 720 (9.93)                                   | 1.99 (1.83,2.16)    |
| Thrombocytopenia      | 194 (2.67)                                | 1,260 (0.36)                                   | 7.39 (6.36,8.58)    | 193 (2.66)                                | 91 (1.25)                                    | 2.12 (1.66,2.72)    |

N: total number of patients in the cohort; n: number of patients with the health outcome; 95% CI: 95% confidence intervals

# BMJ Open

## COVID-19 outcomes among adult patients treated with long-term opioid therapy for chronic non-cancer pain in the United States: a retrospective cohort study

|                                 |                                                                                                                                                                                                                                                                                                                                                          |
|---------------------------------|----------------------------------------------------------------------------------------------------------------------------------------------------------------------------------------------------------------------------------------------------------------------------------------------------------------------------------------------------------|
| Journal:                        | <i>BMJ Open</i>                                                                                                                                                                                                                                                                                                                                          |
| Manuscript ID                   | bmjopen-2021-056436.R1                                                                                                                                                                                                                                                                                                                                   |
| Article Type:                   | Original research                                                                                                                                                                                                                                                                                                                                        |
| Date Submitted by the Author:   | 20-Oct-2021                                                                                                                                                                                                                                                                                                                                              |
| Complete List of Authors:       | Tuan, Wen-Jan; Penn State College of Medicine, Family and Community Medicine<br>Spotts, Hannah; Penn State College of Medicine, Family and Community Medicine<br>Zgierska, Aleksandra E.; Penn State College of Medicine, Department of Family and Community Medicine<br>Lennon, Robert P; Penn State College of Medicine, Family and Community Medicine |
| <b>Primary Subject Heading</b>: | Epidemiology                                                                                                                                                                                                                                                                                                                                             |
| Secondary Subject Heading:      | General practice / Family practice, Evidence based practice, Public health                                                                                                                                                                                                                                                                               |
| Keywords:                       | COVID-19, PRIMARY CARE, Quality in health care < HEALTH SERVICES ADMINISTRATION & MANAGEMENT, Health informatics < BIOTECHNOLOGY & BIOINFORMATICS                                                                                                                                                                                                        |
|                                 |                                                                                                                                                                                                                                                                                                                                                          |

SCHOLARONE™  
Manuscripts





I, the Submitting Author has the right to grant and does grant on behalf of all authors of the Work (as defined in the below author licence), an exclusive licence and/or a non-exclusive licence for contributions from authors who are: i) UK Crown employees; ii) where BMJ has agreed a CC-BY licence shall apply, and/or iii) in accordance with the terms applicable for US Federal Government officers or employees acting as part of their official duties; on a worldwide, perpetual, irrevocable, royalty-free basis to BMJ Publishing Group Ltd ("BMJ") its licensees and where the relevant Journal is co-owned by BMJ to the co-owners of the Journal, to publish the Work in this journal and any other BMJ products and to exploit all rights, as set out in our [licence](#).

The Submitting Author accepts and understands that any supply made under these terms is made by BMJ to the Submitting Author unless you are acting as an employee on behalf of your employer or a postgraduate student of an affiliated institution which is paying any applicable article publishing charge ("APC") for Open Access articles. Where the Submitting Author wishes to make the Work available on an Open Access basis (and intends to pay the relevant APC), the terms of reuse of such Open Access shall be governed by a Creative Commons licence – details of these licences and which [Creative Commons](#) licence will apply to this Work are set out in our licence referred to above.

Other than as permitted in any relevant BMJ Author's Self Archiving Policies, I confirm this Work has not been accepted for publication elsewhere, is not being considered for publication elsewhere and does not duplicate material already published. I confirm all authors consent to publication of this Work and authorise the granting of this licence.

**Title**

COVID-19 outcomes among adult patients treated with long-term opioid therapy for chronic non-cancer pain in the United States: a retrospective cohort study

**Authors and affiliations**

1st Author (Corresponding Author): Wen-Jan Tuan, DHA, MS, MPH

Affiliation: Departments of Family and Community Medicine, and Public Health Sciences, College of Medicine, Pennsylvania State University, Pennsylvania, USA

Address: P.O. Box 850, MC HS72 Hershey, PA 17033

E-mail: wtuan@pennstatehealth.psu.edu

ORCIDID: 0000-0003-3939-8979

2nd Author: Hannah Spotts

Affiliation: Departments of Family and Community Medicine, College of Medicine, Pennsylvania State University, Pennsylvania, USA

Address: P.O. Box 850, MC HS72 Hershey, PA 17033

E-mail: hspotts@pennstatehealth.psu.edu

ORCIDID: 0000-0001-5994-7360

3rd Author: Aleksandra E. Zgierska

Affiliation: Departments of Family and Community Medicine, College of Medicine, Pennsylvania State University, Pennsylvania, USA

Address: P.O. Box 850, MC HS72 Hershey, PA 17033

E-mail: azgierska@pennstatehealth.psu.edu

ORCIDID: 0000-0002-7773-6003

1  
2  
3 4th Author: Robert P. Lennon  
4

5 Affiliation: Departments of Family and Community Medicine, College of Medicine,  
6

7 Pennsylvania State University, Pennsylvania, USA  
8

9  
10 Address: P.O. Box 850, MC HS72 Hershey, PA 17033  
11

12 E-mail: rlennon@pennstatehealth.psu.edu  
13

14 ORCIDID: 0000-0003-0973-5890  
15  
16

17  
18 **Word Count** 3,044 words  
19

20 **Keywords** COVID-19, Opioids, Electronic Health Records, Cohort Study  
21  
22  
23  
24  
25  
26  
27  
28  
29  
30  
31  
32  
33  
34  
35  
36  
37  
38  
39  
40  
41  
42  
43  
44  
45  
46  
47  
48  
49  
50  
51  
52  
53  
54  
55  
56  
57  
58  
59  
60

## ABSTRACT

### Objective

Patients treated with long-term opioid therapy (LTOT) are known to have compromised immune systems and respiratory function, both of which make them particularly susceptible to the SARS-CoV-2 virus. The objective of this study was to assess the risk of developing severe clinical outcomes among COVID-19 non-cancer patients on LTOT, compared to those without LTOT.

### Design and data sources

A retrospective cohort design using electronic health records in the TriNetX research database.

### Participants and setting

418,216 adults diagnosed with COVID-19 in January-December 2020 from 51 U.S. healthcare organizations: 9,558 in the LTOT and 408,658 in the control cohort. They did not have cancer diagnoses; only a small proportion might have been treated with opioid maintenance for opioid use disorder.

### Results

Patient on LTOT had a higher risk ratio (RR) than control patients to visit an emergency department (RR=2.04, 95% Confidence Interval (CI) 1.93 to 2.16) and be hospitalized (RR=2.91, 95% CI 2.69 to 3.15). Once admitted, LTOT patients were more likely to require intensive care (RR=3.65, 95% CI 3.10 to 4.29), mechanical ventilation (RR=3.47, 95% CI 2.89 to 4.15), and vasopressor support (RR=5.28, 95% CI 3.70 to 7.53), and die within 30 days (RR=1.96, 95% CI 1.67 to 2.30). The LTOT group also showed increased risk (RRs from 2.06 to 3.98, all significant to 95% confidence) of more-severe infection (e.g., cough, dyspnea, fever, hypoxemia, thrombocytopenia, and acute respiratory distress syndrome). Statistically significant differences in several laboratory results and other vital signs appeared clinically negligible.

### Conclusion

1  
2  
3 COVID-19 patients on LTOT were at higher risk of increased morbidity, mortality, and  
4  
5 healthcare utilization. Interventions to reduce the need for LTOT and to increase compliance  
6  
7 with COVID-19 protective measures may improve outcomes and reduce healthcare cost in this  
8  
9 population. Prospective studies need to confirm and refine these findings.  
10  
11  
12  
13  
14  
15  
16  
17  
18  
19  
20  
21  
22  
23  
24  
25  
26  
27  
28  
29  
30  
31  
32  
33  
34  
35  
36  
37  
38  
39  
40  
41  
42  
43  
44  
45  
46  
47  
48  
49  
50  
51  
52  
53  
54  
55  
56  
57  
58  
59  
60

## Strengths and Limitations of this Study

- This study utilized large-scale electronic health record (EHR)-based data and propensity score matching to assess the risk of morbidity and mortality from SARS-CoV-2 infection among U.S. adults treated with long-term opioids for chronic non-cancer pain.
- The study findings can help shape the conversations between clinicians, public health personnel, and patients on optimal prevention and early treatment protocols for safer and more effective long-term opioid therapy.
- As a retrospective cohort study, the analysis may be missing data from patients tested or treated for COVID-19 infection outside the research data network, potentially skewing results.
- The study did not assess associations between the dosage of prescribed opioids and the outcomes in patients with COVID-19 illness.

## INTRODUCTION

The COVID-19 pandemic, resulting from SARS-CoV-2 infection, has rapidly spread across the United States since early 2020. By the end of 2020, there were over 20 million confirmed cases and 344,000 deaths reported in the U.S.[1] This unprecedented upheaval has led to deaths from the novel coronavirus, in addition to deaths caused by the effects of protracted economic stagnation and social disruption. Vulnerable populations with mental illness or substance use disorders have been disproportionately affected.[2,3] As the nation focuses on the COVID-19 pandemic, the opioid crisis has continued to have devastating impacts on communities. Recent statistics show a 38.4% increase in opioid-related deaths from June 2019 to May 2020,[4] and state-level data have linked stressors of the COVID-19 pandemic to surge in fatal overdoses.[5] Literature suggests the opioid crisis has been escalated by a lack of access to drug screening and treatment for opioid use disorder (OUD) due to care disruption by the COVID-19 pandemic.[6] Ongoing opioid addiction prevention efforts have also been disrupted by social distancing practices and isolation that can contribute to the misuse of prescription or illicit opioids.[3,7] However, studies focused on the opioid crisis in the United States often look only at persons with substance abuse disorders, who have numerous comorbidities with independent COVID-19 risk; little is known about the impact of COVID-19 on people on long-term opioid therapy (LTOT) who do not have such disorders, but may be at increased COVID-19 risk by virtue of their LTOT alone.

Research shows that opioids can trigger acute respiratory depression (e.g., hypoventilation and hypoxemia) through the activation of opioid receptors in the brainstem can lead to respiratory failure or death.[8] Chronic opioid use also increases the risk of immunosuppression and infections, including among people on LTOT.[9] These individuals are

1  
2  
3 likely to have cardiopulmonary morbidity, longer hospitalization, and greater overall care costs.  
4  
5 With severe COVID-19 infection, patients may also present with clinical signs and symptoms of  
6  
7 respiratory depression.[10,11] Approximately 10-15% of patients hospitalized for COVID-19  
8  
9 progressed to acute respiratory distress syndrome.[12, 13] While the risk of increasing morbidity  
10  
11 and mortality from SARS-CoV-2 infection among individuals with certain health conditions has  
12  
13 been identified and incorporated into outcome prediction models, the relationship between LTOT  
14  
15 and SARS-CoV-2-related morbidity and mortality has not been assessed.[14] The likelihood of  
16  
17 worsened outcomes in patients on LTOT and with COVID-19 may be caused by the mechanisms  
18  
19 of respiratory depression and immunosuppression.[15] As a result, this patient population may be  
20  
21 expected to have more severe health outcomes, potentially resulting in an increased risk of  
22  
23 hospitalization, emergency department admissions, and time in the intensive care unit.[16,17]  
24  
25 Critically ill patients with SARS-CoV-2 were also more likely to be treated with mechanical  
26  
27 ventilation and vasopressors.[18,19] Although COVID-19 outcomes are known to be worse in  
28  
29 persons with opioid and other substance use disorders,[20] such disorders may be clinically  
30  
31 under- diagnosed. Further, the vast majority of persons prescribed opioids for chronic pain do not  
32  
33 have substance use disorders,[21] yet may still be at risk from their LTOT alone. Hence, research  
34  
35 is urgently needed to investigate long-term opioid use in populations beyond those with  
36  
37 substance use disorders as a pathway to severe COVID-19.  
38  
39  
40  
41  
42  
43

44 This study aims to assess the risk of developing severe outcomes among adults with  
45  
46 LTOT for chronic non-cancer pain and with COVID-19 infection in the U.S. in order to help  
47  
48 clinicians develop more effective care guidelines for patients with COVID-19 and raise  
49  
50 awareness about the risks of COVID-19 to vulnerable populations.  
51  
52  
53  
54  
55  
56  
57  
58  
59  
60



## METHODS

### Study design and data collection

The study applied a retrospective cohort design using electronic health records (EHRs) from 51 healthcare organizations, members of the research network of the TriNetX database in the United States (Cambridge, MA). TriNetX is a federated health research network that provides access to continuously updated, de-identified EHR data (demographics, diagnoses, procedures, medications, laboratory tests, and genomics) of more than 68 million patients from participating healthcare organizations. The TriNetX platform only uses aggregated counts and statistical summaries. All the data queries were performed in the TriNetX online portal managed by the Penn State Clinical and Translational Science Institute. Because there was no protected health information data accessed in the analysis, this research was determined to be exempt from the Institutional Review Board oversight.

### Cohort description

The study population consisted of adults (age $\geq$ 18 years) a diagnosis of COVID-19 between January 1, 2020 and December 31, 2020, based on the combination of one or more disease indicators, including ICD-10 diagnosis codes or positive laboratory test results. Individuals are considered on long-term opioid therapy (LTOT) when they are prescribed with opioids in 3 or more consecutive months or at least 90 days at outpatient settings.[22,23] COVID-19 patients meeting the LTOT criteria within 12 months before their infection were assigned to the LTOT cohort. Individuals with COVID-19 without LTOT in the past 12 months were assigned to the control cohort. The analysis excluded individuals who had cancers, or living in nursing home, hospice or palliative care facilities.

Moreover, this study included various types of opioid analgesics prescribed in outpatient settings, and targeted the population of adults with chronic non-cancer pain. We excluded patients who had cancer diagnoses to limit the impact of opioids prescribed for cancer pain. Although methadone and buprenorphine can be used to treat OUD in addition to chronic pain, methadone prescriptions issued in the outpatient settings are exclusively for pain care; only specialized opioid treatment programs (OTPs) can use methadone for OUD care by dispensing it, thus, this clinical application would not have been captured in our dataset. Buprenorphine can be prescribed for OUD in the outpatient settings for both chronic pain and OUD indications; the research dataset did not allow us to determine the specific indication; we elected to retain those treated with buprenorphine because buprenorphine could have been prescribed to treat chronic pain. In addition, only a small proportion of the study sample was treated with buprenorphine (5.0%), with even smaller proportion (1.6%) having both the OUD diagnosis and being prescribed buprenorphine during the study period.

### **Outcome indicators**

The severity of the COVID-19 infection was assessed through three areas: healthcare utilization, clinical presentation, and diagnostic testing. The healthcare utilization and mortality measures included binary variables (Yes/No) indicating whether patients were admitted to emergency department (ED), inpatient hospital, intensive care unit, placed on mechanical ventilation, treated with vasopressors, or died within 30 days after being infected by COVID-19. Similarly, the clinical presentation measures also indicated the presence/absence (Yes/No) of severe physical signs or medical complication, including cough, fever, acute respiratory distress syndrome (ARDS), hypoxemia, thrombocytopenia, and dyspnea. The diagnostic testing consisted of common biometrics or laboratory tests serving as severity indicators of COVID-19

1  
2  
3 infection, such as C-reactive protein, serum creatinine, and blood urea nitrogen. These tests have  
4  
5 also been used to predict the risk of increased COVID-19-related morbidity and mortality in both  
6  
7 inpatient and outpatient settings.[14,24]  
8  
9

## 10 **Data Analysis**

11  
12 Data in the TriNetX database have been shown referential integrity and be reliable.[25]  
13  
14 The coding information of the research data also underwent extensive curation and was mapped  
15  
16 to common clinical terminologies to ensure high usability and consistency with the Reporting of  
17  
18 studies Conducted using Observational Routinely collected Data (RECORD) guidelines  
19  
20 criteria.[26] A number of patient characteristics were considered potential confounding variables,  
21  
22 including age, sex, race/ethnicity, and comorbidities (diabetes, essential hypertension, chronic  
23  
24 pulmonary conditions, cardiovascular diseases, chronic kidney diseases, mental health  
25  
26 disorders). To address potential confounding effects of the socioeconomic status, we included  
27  
28 diagnoses, which may indicate increased risk due to socioeconomic and psychosocial  
29  
30 circumstances (education and literacy, employment, housing, lack of adequate food or water, or  
31  
32 exposure to occupational hazards). The study applied a 1:1 propensity score matching (PSM)  
33  
34 technique to balance the baseline characteristics between the comparison and control cohorts,  
35  
36 and reduce potential selection bias. The matching method was performed using nearest neighbor  
37  
38 algorithms with a caliper width of 0.1 pooled standard deviation. Outcomes were compared in  
39  
40 COVID-19 patients on LTOT and COVID-19 patients not on LTOT using logistic regression  
41  
42 modeling before and after propensity score matching. Risk ratios (RR), with 95% confidence  
43  
44 intervals (95% CI) were computed and a two-sided alpha of less than 0.05 was defined *a*  
45  
46 *priori* for statistical significance between the two groups. All data queries and statistical analyses  
47  
48  
49  
50  
51  
52  
53  
54  
55  
56  
57  
58  
59  
60

were performed using build-in analytics functions on the TriNetX portal. Detailed information for the diagnoses and laboratory tests are provided in supplemental table 1.

### Patients and public involvement statement

Neither patients nor the public were involved in the design, or conduct, or reporting, or dissemination plans of our research.

## RESULTS

### Study population

A total of 418,216 patients diagnosed with COVID-19 from 51 healthcare organizations met the study eligibility criteria, including 9,558 individuals in the LTOT cohort and 408,658 in the non-LTOT cohort. Before propensity score matching, the LTOT cohort was older, with a greater percentage of female, White and Black patients compared to the control cohort (see table 1).

**Table 1.** Patient demographics and comorbidities, before and after propensity score matching

| Characteristic                            | Before propensity score matching   |                                         |         | After propensity score matching    |                                       |         | Standardized mean difference |
|-------------------------------------------|------------------------------------|-----------------------------------------|---------|------------------------------------|---------------------------------------|---------|------------------------------|
|                                           | Long-term opioid therapy (N=9,558) | No long-term opioid therapy (N=408,658) | P value | Long-term opioid therapy (N=9,558) | No long-term opioid therapy (N=9,558) | P value |                              |
| Age, mean ± SD                            | 52.1±17.1                          | 43.1±17.6                               | <0.001  | 52.1±17.1                          | 52.7±17.7                             | 0.063   | 0.033                        |
| Sex                                       |                                    |                                         |         |                                    |                                       |         |                              |
| Female, n (%)                             | 5,793 (60.6)                       | 208,267 (51)                            | <0.001  | 5,793 (60.6)                       | 5,743 (60.1)                          | 0.460   | 0.011                        |
| Male, n (%)                               | 3,764 (39.4)                       | 199,947 (48.9)                          | <0.001  | 3,764 (39.4)                       | 3,804 (39.8)                          | 0.554   | 0.009                        |
| Hispanic or Latino                        |                                    |                                         |         |                                    |                                       |         |                              |
| Yes, n (%)                                | 1,384 (14.5)                       | 50,634 (12.4)                           | <0.001  | 1,384 (14.5)                       | 1,320 (13.8)                          | 0.184   | 0.019                        |
| No, n (%)                                 | 6,017 (63)                         | 178,818 (43.8)                          | <0.001  | 6,017 (63)                         | 5,995 (62.7)                          | 0.742   | 0.005                        |
| Race                                      |                                    |                                         |         |                                    |                                       |         |                              |
| White, n (%)                              | 5,969 (62.5)                       | 212,907 (52.1)                          | <0.001  | 5,969 (62.5)                       | 6,045 (63.2)                          | 0.255   | 0.016                        |
| Black or African American, n (%)          | 2,200 (23)                         | 62,396 (15.3)                           | <0.001  | 2,200 (23)                         | 2,234 (23.4)                          | 0.560   | 0.008                        |
| Unknown, n (%)                            | 1,128 (11.8)                       | 120,420 (29.5)                          | <0.001  | 1,128 (11.8)                       | 1,029 (10.8)                          | 0.094   | 0.033                        |
| Essential (primary) hypertension, n (%)   | 4,816 (50.4)                       | 39,656 (9.7)                            | <0.001  | 4,816 (50.4)                       | 4,983 (52.1)                          | 0.166   | 0.035                        |
| Chronic lower respiratory diseases, n (%) | 2,425 (25.4)                       | 19,849 (4.9)                            | <0.001  | 2,425 (25.4)                       | 2,561 (26.8)                          | 0.250   | 0.032                        |

|                                    |              |              |        |              |              |        |       |
|------------------------------------|--------------|--------------|--------|--------------|--------------|--------|-------|
| Diabetes mellitus, n (%)           | 2,682 (28.1) | 18,589 (4.5) | <0.001 | 2,682 (28.1) | 2,639 (27.6) | 0.488  | 0.010 |
| Overweight and obesity, n (%)      | 3,089 (32.3) | 23,383 (5.7) | <0.001 | 3,089 (32.3) | 3,171 (33.2) | 0.206  | 0.018 |
| Ischemic heart diseases, n (%)     | 1,575 (16.5) | 7,336 (1.8)  | <0.001 | 1,575 (16.5) | 1,422 (14.9) | <0.020 | 0.044 |
| Heart failure, n (%)               | 1,176 (12.3) | 3,865 (0.9)  | <0.001 | 1,176 (12.3) | 925 (9.7)    | <0.010 | 0.084 |
| Chronic kidney disease, n (%)      | 1,448 (15.2) | 5,123 (1.3)  | <0.001 | 1,448 (15.2) | 1,294 (13.5) | <0.010 | 0.046 |
| Nicotine dependence, n (%)         | 1,232 (12.9) | 8,937 (2.2)  | <0.001 | 1,232 (12.9) | 1,248 (13.1) | 0.73   | 0.005 |
| Alcohol related disorders, n (%)   | 430 (4.5)    | 2,848 (0.7)  | <0.001 | 430 (4.5)    | 426 (4.5)    | 0.889  | 0.002 |
| Socioeconomic circumstances, n (%) | 469 (4.9)    | 2,772 (0.7)  | <0.001 | 469 (4.9)    | 464 (4.9)    | 0.867  | 0.002 |

n, Number of patients; SD, Standard deviation

The LTOT cohort had a greater proportion of males and patients with an unidentified race, and consistently higher prevalence of comorbidities than their non-LTOT counterparts. After propensity score matching, most of these differences became not significant, suggesting the demographic characteristics and comorbid conditions were well-balanced between the LTOT and non-LTOT cohorts. Moreover, absolute standardized differences for all measured baseline characteristics were less than 10%, further confirming that both cohorts had similar distributions of the observed baseline characteristics and matched samples.[27]

### Healthcare utilization and mortality

Before the propensity score matching, COVID-19 patients on LTOT were more likely to visit ED (RR=3.80; 95% CI 3.67 to 3.92) and be hospitalized (RR=6.62; 95% CI 6.36 to 6.90) than individuals without LTOT. They also were more likely to receive intensive care (RR=9.03; 95% CI 8.33 to 9.80), mechanical ventilation (RR=7.75; 95% CI 7.07 to 8.50), and vasopressors (RR=10.42; 95% CI 8.90 to 12.20), and were more likely to die within 30 days post-COVID-19 diagnosis (RR=4.04; 95% CI 8.90 to 12.20), compared to their non-LTOT counterparts. After PSM, the adjusted risk of utilizing inpatient care resources or extensive life support remained 2.0-5.3 times higher for patients on LTOT compared to the control cohort (all significant to 95% confidence) (see figure 1). The 30-day post-diagnosis mortality rates were also found to be consistently higher in the LTOT cohort, regardless of the PSM adjustment (RR=1.96; 95% CI

1  
2  
3 1.67 to 2.30) See supplemental table 2 for details of our results before and after propensity score  
4  
5 matching .  
6

### 7 8 **Clinical presentation**

9  
10 In pre-matching analysis, patients on LTOT were three times more likely ( $p<0.01$ ) to  
11 have fever and/or cough than their non-LTOT counterparts. The LTOT cohort also showed  
12 greater risk of ARDS (RR=3.98; 95% CI 2.91 to 5.44), hypoxemia (RR=2.41; 95% CI 2.10 to  
13 2.76), dyspnea (RR=2.18; 95% CI 2.03 to 2.35), and thrombocytopenia (RR=2.28; 95% CI 1.84  
14 to 2.84). In the post PSM analyses, patients on LTOT were consistently found to have more  
15 medical complications compared to non-LTOT patients (see figure 2). The adjusted risk ratios  
16 (all significant to 95% confidence) were 2.06 for cough, 2.24 for fever, 2.18 for dyspnea, 2.28  
17 for thrombocytopenia, 2.41 for hypoxemia, and 3.98 for ARDS. See supplemental table 3 for  
18 details of our results before and after propensity score matching.  
19  
20  
21  
22  
23  
24  
25  
26  
27  
28  
29

### 30 31 **Laboratory tests**

32  
33 Mixed results were found in vital and laboratory tests commonly ordered to assess the  
34 severity of COVID-19 in the pre- and post-propensity score matching analyses (see table 2).  
35 Higher systolic blood pressure (126.9 vs 124.3,  $p<0.01$ ) was observed among LTOT patients  
36 before PSM, while there were no significant differences in lower systolic (126.7 vs 127.6,  
37  $p=0.09$ ) and diastolic (74.7 vs 75.1,  $p=0.12$ ) blood pressure values between LTOT and non-  
38 LTOT patients after matching.  
39  
40  
41  
42  
43  
44  
45  
46  
47  
48  
49  
50  
51  
52  
53  
54  
55  
56  
57  
58  
59  
60

**Table 2.** Laboratory test results among COVID-19 patients with LTOT compared to COVID-19 patients without LTOT

| Type                       | Before propensity score matching     |                                         |         | After propensity score matching      |                                         |         |
|----------------------------|--------------------------------------|-----------------------------------------|---------|--------------------------------------|-----------------------------------------|---------|
|                            | Long-term opioid therapy mean±SD (n) | No long-term opioid therapy mean±SD (n) | P value | Long-term opioid therapy mean±SD (n) | No long-term opioid therapy mean±SD (n) | P value |
| Systolic blood pressure    | 126.92±20.88 (6751)                  | 124.32±18.45 (115578)                   | <0.001  | 126.92±20.88 (6745)                  | 127.57±18.97 (4591)                     | 0.092   |
| Diastolic blood pressure   | 74.72±13.3 (6955)                    | 74.5±12.25 (117093)                     | 0.144   | 74.72±13.29 (6949)                   | 75.1±12.64 (4635)                       | 0.124   |
| Leukocytes                 | 8.08±5.37 (6249)                     | 8.05±29.6 (81865)                       | 0.935   | 8.08±5.37 (6245)                     | 7.73±3.46 (3214)                        | <0.001  |
| Lymphocytes                | 23.52±12.25 (5244)                   | 25.31±11.73 (73104)                     | <0.001  | 23.52±12.25 (5238)                   | 24.79±11.3 (2852)                       | <0.001  |
| Platelets                  | 259.71±99.28 (6373)                  | 263.86±91.06 (82724)                    | <0.001  | 259.76±99.29 (6367)                  | 256.82±84.74 (3300)                     | 0.147   |
| Serum creatinine           | 1.43±4.19 (6511)                     | 1.01±1.99 (82058)                       | <0.001  | 1.43±4.19 (6505)                     | 1.19±1.33 (3715)                        | <0.001  |
| Blood urea nitrogen        | 19.42±15.94 (5363)                   | 16.89±12.66 (66174)                     | <0.001  | 19.4±15.93 (5357)                    | 18.45±12.87 (3267)                      | 0.004   |
| Lactate dehydrogenase      | 374.05±680.51 (1800)                 | 369.42±503.9 (17146)                    | 0.721   | 374.17±680.87 (1798)                 | 318.18±177.96 (628)                     | 0.042   |
| Alanine aminotransferase   | 40.4±194.16 (5764)                   | 42.75±152.74 (67653)                    | 0.275   | 40.42±194.26 (5758)                  | 31.49±50.56 (2954)                      | 0.014   |
| Aspartate aminotransferase | 51.18±447.66 (5755)                  | 42.48±362.99 (67173)                    | 0.087   | 51.21±447.89 (5749)                  | 42.39±106.06 (2997)                     | 0.231   |
| Alkaline phosphatase       | 95.62±62.63 (5677)                   | 80.31±48.37 (66328)                     | <0.011  | 95.54±62.55 (5671)                   | 84.65±42.9 (3036)                       | <0.001  |
| Serum ferritin             | 613.81±1870.26 (2614)                | 742.76±2742.34 (22438)                  | 0.019   | 614.02±1870.59 (2613)                | 545.99±959.78 (1011)                    | 0.271   |
| Troponin I                 | 0.38±3.32 (1338)                     | 0.72±12.59 (6906)                       | 0.332   | 0.39±3.33 (1334)                     | 0.25±1.21 (299)                         | 0.494   |
| C-reactive protein         | 46.33±67.13 (2644)                   | 37.53±56.76 (25138)                     | <0.001  | 46.32±67.14 (2642)                   | 38.35±56.43 (906)                       | <0.001  |

Measurement unit: leukocytes in 1000/microliter; platelets in 1,000/microliter; serum creatinine in mg/dL; C-reactive protein (CRP) in mg/L; lymphocytes, blood urea nitrogen (BUN) in mg/dL; serum ferritin, troponin I in ng/mL; lactate dehydrogenase (LDH), alanine aminotransferase (ALT), aspartate aminotransferase (AST), alkaline phosphatase (ALP) in units/liter

The pre-matching analysis further showed that the LTOT cohort had a lower concentration of serum ferritin (613.8 vs 742.8,  $p<0.01$ ) and lower platelet count (259.7 vs 263.9,  $p<0.01$ ), but differences in these lab results were not significantly different between the two cohorts in the post-matching analysis. Despite no difference found in the leukocyte count and alanine aminotransferase concentration before matching, elevation in leukocytes (8.1 vs 7.7,  $p<0.01$ ) and alanine aminotransferase (40.4 vs 31.5,  $p<0.01$ ) were observed in the LTOT cohort after the matching, compared to the control cohort. Moreover, in both the pre- and post-matching analyses, patients on LTOT showed lower lymphocyte counts (23.5 vs 25.3,  $p<0.01$  before matching; 23.5 vs 24.8,  $p<0.01$  after matching), yet greater serum concentrations of creatinine, alkaline phosphatase, and C-relative protein than their non-LTOT counterparts (see table 2).

## DISCUSSION

The COVID-19 pandemic has presented persistent public health challenges, particularly among populations with a history of substance use and mental health conditions. Amidst the pandemic, the crisis of the opioid epidemic has continued to rise and strain healthcare resources, society productivity and general well-being.[16,17] Yet, while the literature has identified the pernicious effects of COVID-19 on individuals with OUD,[6,20] little is known about the outcomes and presentation of COVID-19 among patients treated with LTOT for chronic non-cancer pain. Given the magnitude of both crises, lack of understanding of the relationship between COVID-19 and LTOT represents a gap, which can disadvantage clinicians when considering prevention and early treatment among individuals in this population.

This study revealed that COVID-19 patients with a history of long-term opioid therapy were more likely to be admitted to the hospital, emergency department, and intensive care unit, and have higher 30-day mortality rates. Additionally, there was greater use of both vasopressors and mechanical ventilation, suggesting that long-term opioid users are more likely to get severely ill from COVID-19. This aligns with the existing literature that found the need for respiratory support in the ICU among COVID-19 patients struggling with hypoxemia.[28] Previous studies have shown more hospitalizations, ICU admissions, and death among COVID-19 patients with any form of substance use disorder, with particularly strong associations among patients with OUD.[20,29,30] Our study demonstrates that patients on LTOT, which was primarily for chronic non-cancer pain, are also at increased risk of severe symptoms such as cough, fever, hypoxemia, dyspnea, thrombocytopenia, and acute respiratory distress syndrome. There is significant overlap between the ways in which the pathophysiology of COVID-19 and the interactions of opioids



1  
2  
3 with their  $\mu$ -receptors mediate both respiratory damage and immunosuppression.[10,11,31] As  
4  
5 such, opioids can contribute to a decrease in cytokine and leukocyte recruitment, compromising  
6  
7 the innate and adaptive immune pathways, potentially making individuals more susceptible to  
8  
9 infection at the same time as opioid-induced respiratory depression amplifies hypoxemia in  
10  
11 COVID-19.[9,15] While there is conflicting literature on the direct effects of opioids on  
12  
13 cardiovascular events such as myocardial infarction, some research has demonstrated how  
14  
15 cardiorespiratory co-morbidities play a role in the increased risk of severe outcomes among  
16  
17 COVID-19 patients with opioid use disorder.[30,32]  
18  
19  
20

21  
22 Several studies have also examined the prognostic value of various laboratory tests in the  
23  
24 setting of severe COVID-19. There were significant differences in leukocytes, lymphocytes,  
25  
26 serum creatinine, blood urea nitrogen, alanine aminotransferase, alkaline phosphatase, and C-  
27  
28 reactive protein in our results after propensity score matching. Previous studies have shown that  
29  
30 COVID-19 patients have demonstrated some degree of lymphopenia with or without leukopenia,  
31  
32 alterations in neutrophil to lymphocyte ratios, mild decreases in platelets, and elevations in  
33  
34 inflammatory markers such as C-reactive protein and erythrocyte sedimentation rate.[11,33] In  
35  
36 patients on prescription opioids, research has documented some elevations in C-reactive protein  
37  
38 and altered platelet, lymphocyte, and monocyte ratios.[34, 35] Elevations in kidney, liver, and  
39  
40 other systemic organ lab results may indicate the effects of COVID-19 on causing multi-system  
41  
42 organ damage or failure.[11,30] However, the absolute difference between groups for each of the  
43  
44 laboratory values is small, with doubtful clinical significance.  
45  
46  
47  
48

### 49 **Limitations**

50  
51 This study has several limitations to note and consider. First, there is a possibility that  
52  
53 patients on LTOT captured in the TriNetX research database received their COVID-19 diagnosis  
54  
55  
56  
57  
58  
59  
60

1  
2  
3 or laboratory testing at facilities outside of the participating networks, and therefore would not  
4  
5 have been included in the analysis. Second, although ideally we would have been able to clearly  
6  
7 delineate a population of patients with LTOT prescribed for chronic non-cancer pain, it is  
8  
9 possible that patients included in our analysis could have had long-term opioids prescribed for  
10  
11 cancer pain or for OUD. Our excursion criteria with cancer diagnoses and preliminary analyses  
12  
13 used to estimate the proportion of patients with OUD diagnoses in our sample were designed to  
14  
15 mitigate these impacts. Third, we were unable to account for the potential impact of opioid dose,  
16  
17 because calculation of the daily morphine-equivalent dose was not possible when using the  
18  
19 available TriNetX data. We were also limited in our ability to determine the specific timing of  
20  
21 opioid use in relation to the COVID-19 infection; the TriNetX data provided the information on  
22  
23 opioid prescriptions issued within a specific timeframe but this may not necessarily correspond  
24  
25 to real-life use of opioids by patients; future research should implement a design, which could  
26  
27 enable of better evaluation of timing/dose of opioids in relation to outcomes of interest. Fourth,  
28  
29 there are several important socioeconomic factors that are not available in the research database,  
30  
31 such as type of insurance, education, and urban or rural residence that could act as confounders  
32  
33 in the statistical analysis. However, a strength of the large sample size available allowed for  
34  
35 robust propensity score matching, which enabled us to construct comparable cohorts in order to  
36  
37 best determine the LTOT effects on the selected outcomes and minimize the risk of confounders,  
38  
39 increasing the generalizability of results. Lastly, there may be unobserved or unknown  
40  
41 confounders present that we did not account for in propensity matching. Future analyses utilizing  
42  
43 advanced data mining techniques might be able to better identify currently unidentified yet  
44  
45 important confounders.  
46  
47  
48  
49  
50  
51  
52  
53  
54  
55  
56  
57  
58  
59  
60

## CONCLUSION

This study leveraged EHR data available through a large national research database and suggested that LTOT is associated with increased risk of severe illness and complications, including death, in adults with COVID-19 infection. This is consistent with anticipated worse outcomes secondary to LTOT causing prolonged inflammation, acute respiratory distress, and ineffective immune responses. Efforts to decrease SARS-CoV-2 infection rates in persons on long-term opioid therapy through personal mitigation behaviors (e.g., masking, physical distancing, handwashing) and vaccination are critical to decrease morbidity. Further research, including prospective studies, is needed to confirm and refine these findings. These results suggest that efforts to decrease SARS-CoV-2 infection rates in persons on LTOT (e.g., through personal mitigation behaviors, such as masking, physical distancing, handwashing, and through vaccination) and considering LTOT as a potential prognosticator for worse outcomes could be critical to decrease morbidity and mortality due to COVID-19 infections, particularly in this clinical population..

## Contributors

All authors were involved in revisions, read and approved the final manuscript. WJT contributed to the planning and design of the work, literature review, data analysis, interpretation, and writing the manuscript. HS contributed to literature review, data analysis, interpretation, and writing the manuscript. AEZ and RPL contributed to interpretation and writing the manuscript.

## Funding

The author(s) received no financial support for the research, authorship, and/or publication of this article. The work was conducted through the medical scholar research program of the Penn State Department of Family and Community Medicine. Penn State Clinical and Translational Science Institute provides access to the TriNetX network and is supported by a National Center for Advancing Translational Sciences and its Clinical and Translational Science Award (Grant: UL1 TR002014).

## Competing interests

None declared.

## Ethics approval

Formal ethical approval was not required. All the data queries were performed in the TriNetX online portal managed by the Penn State Clinic and Translational Science Institute. Because there was no protected health information data accessed in the analysis, this research was determined to be exempt from the Institutional Review Board oversight.

## Provenance and peer review

Not commissioned; externally peer reviewed.

## Data availability statement

No additional data are available.

**REFERENCES**

1. Centers for Disease Control and Prevention. CDC COVID data tracker. Available from [https://covid.cdc.gov/covid-data-tracker/#trends\\_totalandratecases](https://covid.cdc.gov/covid-data-tracker/#trends_totalandratecases) [Access on March 5, 2021]
2. Melamed OC, Hauck TS, Buckley L, *et al.* COVID-19 and persons with substance use disorders: inequities and mitigation strategies. *Substance Abuse* 2020;41:286-291. doi:10.1080/08897077.2020.1784363
3. Ornell F, Moura HF, Scherer JN, *et al.* The COVID-19 pandemic and its impact on substance use: implications for prevention and treatment. *Psychiatry Research* 2020;289:113096. doi:10.1016/j.psychres.2020.113096
4. Centers for Disease Control and Prevention. Overdose deaths accelerating during COVID-19. Available from <https://www.cdc.gov/media/releases/2020/p1218-overdose-deaths-covid-19.html> [Access on Feb 17, 2021]
5. Macmadu A, Batthala S, Gabel AMC, Comparison of Characteristics of Deaths From Drug Overdose Before vs During the COVID-19 Pandemic in Rhode Island. *JAMA Netw Open.* 2021;4(9):e2125538. doi:10.1001/jamanetworkopen.2021.25538
6. Khatri UG, Perrone J. Opioid use disorder and COVID-19: crashing of the crises. *J Addict Med* 2020;14:e6-e7. doi:10.1097/ADM.0000000000000684
7. Silva MJ, Kelly Z. The escalation of the opioid epidemic due to COVID-19 and resulting lessons about treatment alternatives. *Am J Manag Care* 2020;26:e202-e204. doi:10.37765/ajmc.2020.43386

- 1  
2  
3 8. Dahan A, Aarts L, Smith TW. Incidence, reversal, and prevention of opioid-induced  
4  
5 respiratory depression. *Anesthesiology* 2020;112:226-  
6  
7 238.doi:10.1097/ALN.0b013e3181c38c25  
8  
9
- 10 9. Wiese AD, Grijalva CG. The use of prescribed opioid analgesics & the risk of serious  
11  
12 infections. *Future Microbiology*, 2018;13:849-852. doi:10.2217/fmb-2018-0101  
13  
14
- 15 10. Grasselli G, Tonetti T, Protti A, *et al.* Pathophysiology of COVID-19-associated acute  
16  
17 respiratory distress syndrome: a multicentre prospective observational study. *Respiratory*  
18  
19 *Medicine* 2020;8:1201-1208. doi:10.1016/S2213-2600(20)30370-2  
20  
21
- 22 11. Ragab D, Salah Eldin H, Taeimah M, *et al.* The COVID-19 cytokine storm; what we know  
23  
24 so far. *Frontiers in immunology* 2020;11:1446. doi:10.3389/fimmu.2020.01446  
25
- 26 12. El-Solh AA, Meduri UG, Lawson Y, *et al.* Clinical course and outcome of COVID-19 acute  
27  
28 respiratory distress syndrome: data from a national repository. *J Intensive Care Med*  
29  
30 2021;36:664-672. doi:10.1177/0885066621994476  
31  
32
- 33 13. Matthay MA, Aldrich JM, Gotts JE. Treatment for severe acute respiratory distress syndrome  
34  
35 from COVID-19. *The Lancet. Respiratory Medicine* 2020;8:433-434. doi:10.1016/S2213-  
36  
37 2600(20)30127-2  
38  
39
- 40 14. Ebell MH, Cai X, Lennon R, *et al.* Development and validation of the COVID-NoLab and  
41  
42 COVID-SimpleLab risk scores for Prognosis in 6 US health systems. *J Am Board Fam*  
43  
44 *Med* 2021;34(Suppl):S127-S135. doi:10.3122/jabfm.2021.S1.200464  
45  
46
- 47 15. Schimmel J, Manini AF. Opioid use disorder and COVID-19: biological plausibility for  
48  
49 worsened outcomes. *Substance Use & Misuse* 2020;55:1900-1901.  
50  
51 doi:10.1080/10826084.2020.1791184  
52  
53  
54  
55  
56  
57  
58  
59  
60

- 1  
2  
3 16. Bentivegna M, Hulme C, Ebell MH. Primary care relevant risk factors for adverse outcomes  
4 in patients with COVID-19 infection: a systematic review. *J Am Board Fam Med*  
5  
6 2021;34(Feb Suppl):S113-S126. doi:10.3122/jabfm.2021.S1.200429  
7  
8  
9  
10 17. Bravata DM, Perkins AJ, Myers LJ, *et al.* Association of intensive care unit patient load and  
11 demand with mortality rates in US Department of Veterans Affairs hospitals during the  
12 COVID-19 pandemic. *JAMA Netw Open* 2021;4:e2034266.  
13  
14 doi:10.1001/jamanetworkopen.2020.34266  
15  
16  
17  
18  
19 18. Ioannou GN, Locke E, Green P, *et al.* Risk factors for hospitalization, mechanical  
20 ventilation, or death among 10131 US veterans with SARS-CoV-2 infection. *JAMA Netw*  
21  
22 *Open* 2020;3:e2022310. doi:10.1001/jamanetworkopen.2020.22310  
23  
24  
25  
26 19. Poston JT, Patel BK, Davis AM. Management of critically ill adults with COVID-19. *JAMA*  
27  
28 2020;323:1839-1841. doi:10.1001/jama.2020.4914  
29  
30  
31 20. Wang QQ, Kaelber DC, Xu R, *et al.* COVID-19 risk and outcomes in patients with substance  
32 use disorders: analyses from electronic health records in the United States. *Molecular*  
33  
34 *Psychiatry*. 2021;26:30-39. doi:10.1038/s41380-020-00880-7  
35  
36  
37  
38 21. Vowles KE, McEntee ML, Julnes PS, *et al.* Rates of opioid misuse, abuse, and addiction in  
39 chronic pain: a systematic review and data synthesis. *Pain*. 2015;156(4):569-76.  
40  
41  
42  
43  
44  
45 22. Von Korff M, Saunders K, Thomas Ray G, *et al.* De facto long-term opioid therapy for  
46 noncancer pain. *Clin J Pain* 2008;24:521-527. doi:10.1097/AJP.0b013e318169d03b  
47  
48  
49 23. Von Korff M, Kolodny A, Deyo RA, *et al.* Long-term opioid therapy reconsidered. *Ann*  
50  
51  
52  
53  
54  
55  
56  
57  
58  
59  
60

- 1  
2  
3 24. Galloway JB, Norton S, Barker RD, *et al.* A clinical risk score to identify patients with  
4  
5 COVID-19 at high risk of critical care admission or death: an observational cohort study. *J*  
6  
7 *Infect* 2020;81:282-288. doi:10.1016/j.jinf.2020.05.064  
8  
9
- 10 25. Topaloglu U, Palchuk MB. Using a Federated Network of Real-World Data to Optimize  
11  
12 Clinical Trials Operations. *JCO Clin Cancer Inform.* 2018;2:1-10. doi:10.1200/CCI.17.00067  
13  
14
- 15 26. Benchimol EI, Smeeth L, Guttman A, *et al.* The reporting of studies conducted using  
16  
17 observational Routinely-collected health data (record) statement. *PLoS Med*  
18  
19 2015;12:e1001885.  
20  
21 doi:10.1371/journal.pmed.1001885pmid:http://www.ncbi.nlm.nih.gov/pubmed/26440803  
22  
23
- 24 27. Morgan CJ. Reducing bias using propensity score matching. *J Nucl Cardiol* 2018;25:404-  
25  
26 406. doi: 10.1007/s12350-017-1012-y  
27
- 28 28. Grasselli G, Zangrillo A, Zanella A, *et al.* Baseline characteristics and outcomes of 1591  
29  
30 patients infected with SARS-CoV-2 admitted to ICUs of the Lombardy region,  
31  
32 Italy. *JAMA* 2020;323:1574-1581. doi:10.1001/jama.2020.5394  
33  
34
- 35 29. Allen B, El Shahawy O, Rogers ES, *et al.* Association of substance use disorders and drug  
36  
37 overdose with adverse COVID-19 outcomes in New York City: January-October 2020. *J*  
38  
39 *Public Health (Oxf)* 2020:fdaa241. doi:10.1093/pubmed/fdaa241  
40  
41
- 42 30. Baillargeon J, Polychronopoulou E, Kuo YF, *et al.* The Impact of Substance Use Disorder on  
43  
44 COVID-19 Outcomes. *Psychiatric Services* 2021;72:578-  
45  
46 581.doi:10.1176/appi.ps.202000534  
47  
48
- 49 31. Algera MH, Kamp J, van der Schrier R, *et al.* Opioid-induced respiratory depression in  
50  
51 humans: a review of pharmacokinetic-pharmacodynamic modelling of reversal. *Br J Anaesth*  
52  
53 2019;122:e168-e179. doi:10.1016/j.bja.2018.12.023  
54  
55  
56  
57  
58  
59  
60



- 1  
2  
3 32. Ogungbe O, Akil L, Ahmad HA. Exploring unconventional risk-factors for cardiovascular  
4 diseases: has opioid therapy been overlooked? *Int J Environ Res Public*  
5 *Health* 2019;16:2564. doi:10.3390/ijerph16142564  
6  
7  
8  
9  
10 33. Pourbagheri-Sigaroodi A, Bashash D, Fateh, F. *et al.* Laboratory findings in COVID-19  
11 diagnosis and prognosis. *Clin Chim Acta* 2020;510:475-482.doi:10.1016/j.cca.2020.08.019  
12  
13  
14 34. Chopan M, Littenberg B. C-reactive protein and prescription opioid use. *Journal of Nature*  
15 *and Science* 2015;1(6):e122. Available at: [https://www.semanticscholar.org/paper/C-](https://www.semanticscholar.org/paper/C-Reactive-Protein-and-Prescription-Opioid-Use-Chopan-Littenberg/34a1e4c23ec517728909880f3458def509adddf0)  
16 [Reactive-Protein-and-Prescription-Opioid-Use-Chopan-](https://www.semanticscholar.org/paper/C-Reactive-Protein-and-Prescription-Opioid-Use-Chopan-Littenberg/34a1e4c23ec517728909880f3458def509adddf0)  
17 [Littenberg/34a1e4c23ec517728909880f3458def509adddf0](https://www.semanticscholar.org/paper/C-Reactive-Protein-and-Prescription-Opioid-Use-Chopan-Littenberg/34a1e4c23ec517728909880f3458def509adddf0)  
18  
19  
20  
21  
22  
23  
24 35. Orum MH, Kara MZ, Egilmez OB, *et al.* Complete blood count alterations due to the opioid  
25 use: what about the lymphocyte-related ratios, especially in monocyte to lymphocyte ratio  
26 and platelet to lymphocyte ratio? *J Immunoassay Immunochem* 2018;39:365-376.  
27  
28  
29  
30  
31  
32  
33  
34  
35  
36  
37  
38  
39  
40  
41  
42  
43  
44  
45  
46  
47  
48  
49  
50  
51  
52  
53  
54  
55  
56  
57  
58  
59  
60

1  
2  
3  
4  
5  
6  
7  
8  
9  
10  
11  
12  
13  
14  
15  
16  
17  
18  
19  
20  
21  
22  
23  
24  
25  
26  
27  
28  
29  
30  
31  
32  
33  
34  
35  
36  
37  
38  
39  
40  
41  
42  
43  
44  
45  
46  
47  
48  
49  
50  
51  
52  
53  
54  
55  
56  
57  
58  
59  
60

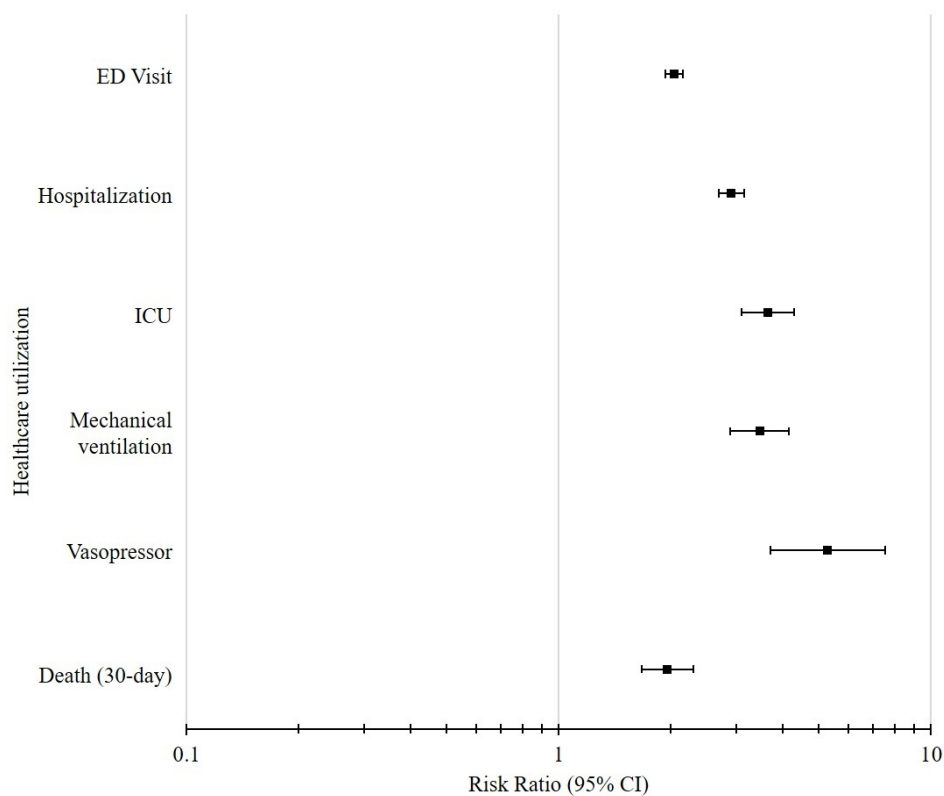

The study period was in January-December 2020; the control cohort consisted of COVID-19 patients without LTOT

Figure 1. Healthcare utilization among COVID-19 patients with LTOT compared to COVID-19 patients without LTOT

96x81mm (300 x 300 DPI)

1  
2  
3  
4  
5  
6  
7  
8  
9  
10  
11  
12  
13  
14  
15  
16  
17  
18  
19  
20  
21  
22  
23  
24  
25  
26  
27  
28  
29  
30  
31  
32  
33  
34  
35  
36  
37  
38  
39  
40  
41  
42  
43  
44  
45  
46  
47  
48  
49  
50  
51  
52  
53  
54  
55  
56  
57  
58  
59  
60

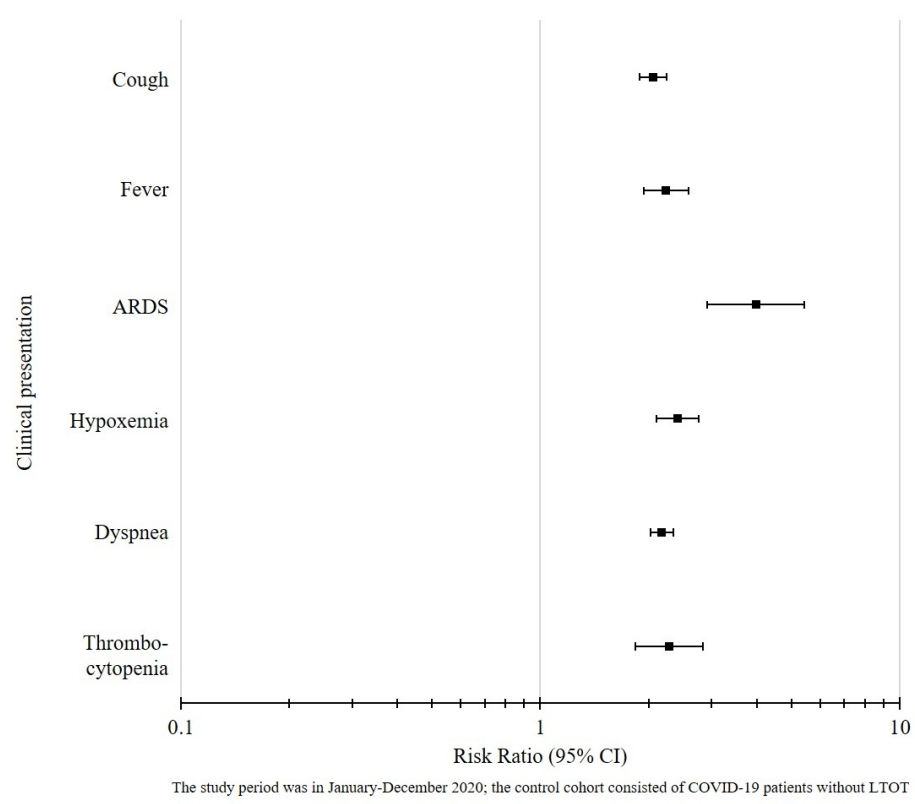

Figure 2. Clinical presentation among COVID-19 patients with LTOT compared to COVID-19 patients without LTOT

100x82mm (300 x 300 DPI)

Supplementary Table 1. Description of coding systems and codes

| Coding system                                | Code                                                        | Description                                                       |
|----------------------------------------------|-------------------------------------------------------------|-------------------------------------------------------------------|
| <i>Codes for COVID-19 diagnoses</i>          |                                                             |                                                                   |
| ICD-10                                       | U07.1, U07.2                                                | COVID-19 (WHO)                                                    |
| ICD-10                                       | B97.29                                                      | Other coronavirus as the cause of diseases classified elsewhere   |
| ICD-10                                       | B34.2                                                       | Coronavirus infection, unspecified                                |
| ICD-10                                       | J12.81                                                      | Pneumonia due to SARS-associated coronavirus                      |
| LOINC                                        | 94505-5,94506-3,94558-4, 94562-6, 94762-2, 94769-7, 95209-3 | SARS-CoV-2 (COVID19) [Presence] in Serum or Plasma by Immunoassay |
| <i>Comorbidity conditions</i>                |                                                             |                                                                   |
| ICD-10                                       | I10                                                         | Essential (primary) hypertension                                  |
| ICD-10                                       | J40-J47                                                     | Chronic lower respiratory diseases                                |
| ICD-10                                       | E10-E11                                                     | Diabetes (type I and type II)                                     |
| ICD-10                                       | E66                                                         | Overweight and obesity                                            |
| ICD-10                                       | I20-I25                                                     | Ischemic health diseases                                          |
| ICD-10                                       | I50                                                         | Heart failure                                                     |
| ICD-10                                       | N18                                                         | Chronic kidney disease                                            |
| ICD-10                                       | F17                                                         | Nicotine dependence                                               |
| ICD-10                                       | F10                                                         | Alcohol related disorders                                         |
| ICD-10                                       | Z55-Z65                                                     | Socioeconomic and psychosocial circumstances                      |
| <i>Laboratory codes for diagnostic tests</i> |                                                             |                                                                   |
| LOINC                                        | 8480-6,76215-3,76534-7,87739-9,87741-5,8459-0,8460-8,8461-6 | Systolic blood pressure                                           |
| LOINC                                        | 8462-4,76535-4,87740-7,87736-5,8453-3,8454-1,8455-8,76213-8 | Diastolic blood pressure                                          |
| LOINC                                        | 26464-8,49498-9,6690-2,804-5                                | Leukocytes                                                        |
| LOINC                                        | 26478-8,30365-1,736-9,737-7                                 | Lymphocyte count                                                  |
| LOINC                                        | 26499-4,751-8,753-4                                         | Neutrophil count                                                  |
| LOINC                                        | 26515-7,49497-1,777-3,778-1                                 | Platelets                                                         |
| LOINC                                        | 2160-0,38483-4                                              | Serum creatinine                                                  |
| LOINC                                        | 3094-0,6299-2                                               | Blood urea nitrogen                                               |
| LOINC                                        | 14804-9,14805-6,2532-0                                      | Lactate dehydrogenase                                             |
| LOINC                                        | 1742-6,1743-4,1744-2,76625-3                                | Alanine aminotransferase                                          |
| LOINC                                        | 1920-8,30239-8                                              | Aspartate aminotransferase                                        |
| LOINC                                        | 1783-0,6768-6                                               | Alkaline phosphatase                                              |
| LOINC                                        | 20567-4,2276-4,24373-3                                      | Serum ferritin                                                    |
| LOINC                                        | 10839-9,42757-5                                             | Troponin I                                                        |
| LOINC                                        | 1988-5,30522-7,71426-1                                      | C-reactive protein                                                |

1  
2  
3  
4  
5  
6  
7  
8  
9  
10  
11  
12  
13  
14  
15  
16  
17  
18  
19  
20  
21  
22  
23  
24  
25  
26  
27  
28  
29  
30  
31  
32  
33  
34  
35  
36  
37  
38  
39  
40  
41  
42  
43  
44  
45  
46  
47

Supplementary Table 2. Healthcare utilization among COVID-19 patients on long-term opioid therapy compared to COVID-19 patients not on long-term opioid therapy

| Utilization     | Before propensity score matching          |                                                |                     | After propensity score matching           |                                              |                     |
|-----------------|-------------------------------------------|------------------------------------------------|---------------------|-------------------------------------------|----------------------------------------------|---------------------|
|                 | Long-term opioid therapy (N=9,558), n (%) | No long-term opioid therapy (N=408,658), n (%) | Risk ratio (95% CI) | Long-term opioid therapy (N=9,558), n (%) | No long-term opioid therapy (N=9,558), n (%) | Risk ratio (95% CI) |
| ED visit        | 2,867 (30.0)                              | 32,323 (7.9)                                   | 3.80 (3.67,3.92)    | 2,867 (30.0)                              | 1,404 (14.7)                                 | 2.04 (1.93,2.16)    |
| Hospitalization | 2,139 (22.4)                              | 13,807 (3.4)                                   | 6.62 (6.36,6.90)    | 2,139 (22.4)                              | 735 (7.7)                                    | 2.91 (2.69,3.15)    |
| ICU             | 664 (7.0)                                 | 3,145 (0.8)                                    | 9.03 (8.33,9.80)    | 664 (7.0)                                 | 182 (1.9)                                    | 3.65 (3.10,4.29)    |
| Mechanical vent | 513 (5.4)                                 | 2,833 (0.7)                                    | 7.75 (7.07,8.50)    | 513 (5.4)                                 | 148 (1.6)                                    | 3.47 (2.89,4.15)    |
| Vasopressor     | 190 (2.0)                                 | 779 (0.2)                                      | 10.42 (8.9,12.2)    | 190 (2.0)                                 | 36 (0.4)                                     | 5.28 (3.70,7.53)    |
| Death (30-day)  | 425 (4.5)                                 | 4,500 (1.1)                                    | 4.04 (3.67,4.46)    | 425 (4.5)                                 | 217 (2.3)                                    | 1.96 (1.67,2.30)    |

N: total number of patients in the cohort; n: number of patients with the health outcome; 95% CI: 95% confidence intervals  
Mechanical vent: Mechanical ventilation

Supplementary Table 3. Clinical presentation among COVID-19 patients on long-term opioid therapy compared to COVID-19 patients not on long-term opioid therapy

| Clinical Presentation | Before propensity score matching          |                                                |                     | After propensity score matching           |                                              |                     |
|-----------------------|-------------------------------------------|------------------------------------------------|---------------------|-------------------------------------------|----------------------------------------------|---------------------|
|                       | Long-term opioid therapy (N=9,558), n (%) | No long-term opioid therapy (N=408,658), n (%) | Risk ratio (95% CI) | Long-term opioid therapy (N=9,558), n (%) | No long-term opioid therapy (N=9,558), n (%) | Risk ratio (95% CI) |
| Cough                 | 1,458 (15.3)                              | 15,350 (3.8)                                   | 4.06 (3.87,4.27)    | 1,458 (15.3)                              | 707 (7.4)                                    | 2.06 (1.89,2.25)    |
| Fever                 | 597 (6.2)                                 | 5,619 (1.4)                                    | 4.54 (4.18,4.93)    | 597 (6.2)                                 | 266 (2.8)                                    | 2.24 (1.94,2.58)    |
| ARDS                  | 195 (2.0)                                 | 996 (0.2)                                      | 8.37 (7.18,9.74)    | 195 (2.0)                                 | 49 (0.5)                                     | 3.98 (2.91,5.44)    |
| Hypoxemia             | 673 (7.0)                                 | 4,581 (1.1)                                    | 6.28 (5.80,6.79)    | 673 (7.0)                                 | 278 (2.9)                                    | 2.41 (2.10,2.76)    |
| Dyspnea               | 2,043 (21.4)                              | 1,6467 (4.0)                                   | 5.31 (5.10,5.54)    | 2,043 (21.4)                              | 936 (9.8)                                    | 2.18 (2.03,2.35)    |
| Thrombocytopenia      | 265 (2.8)                                 | 1,391 (0.3)                                    | 8.14 (7.15,9.27)    | 265 (2.8)                                 | 116 (1.2)                                    | 2.28 (1.84,2.84)    |

N: total number of patients in the cohort; n: number of patients with the health outcome; 95% CI: 95% confidence intervals

Mechanical vent: Mechanical ventilation

The RECORD statement – checklist of items, extended from the STROBE statement, that should be reported in observational studies using routinely collected health data.

|                           | Item No. | STROBE items                                                                                                                                                                                  | Location in manuscript where items are reported | RECORD items                                                                                                                                                                                                                                                                                                                                                                                                                                       | Location in manuscript where items are reported                                                                                                |
|---------------------------|----------|-----------------------------------------------------------------------------------------------------------------------------------------------------------------------------------------------|-------------------------------------------------|----------------------------------------------------------------------------------------------------------------------------------------------------------------------------------------------------------------------------------------------------------------------------------------------------------------------------------------------------------------------------------------------------------------------------------------------------|------------------------------------------------------------------------------------------------------------------------------------------------|
| <b>Title and abstract</b> |          |                                                                                                                                                                                               |                                                 |                                                                                                                                                                                                                                                                                                                                                                                                                                                    |                                                                                                                                                |
|                           | 1        | (a) Indicate the study's design with a commonly used term in the title or the abstract<br>(b) Provide in the abstract an informative and balanced summary of what was done and what was found |                                                 | <p>RECORD 1.1: The type of data used should be specified in the title or abstract. When possible, the name of the databases used should be included.</p> <p>RECORD 1.2: If applicable, the geographic region and timeframe within which the study took place should be reported in the title or abstract.</p> <p>RECORD 1.3: If linkage between databases was conducted for the study, this should be clearly stated in the title or abstract.</p> | <p>Title and abstract<br/>PP: 1, 3</p> <p>Geographic region: title and abstract<br/>Timeframe: abstract<br/>PP: 1, 3</p> <p>Not applicable</p> |
| <b>Introduction</b>       |          |                                                                                                                                                                                               |                                                 |                                                                                                                                                                                                                                                                                                                                                                                                                                                    |                                                                                                                                                |
| Background rationale      | 2        | Explain the scientific background and rationale for the investigation being reported                                                                                                          |                                                 |                                                                                                                                                                                                                                                                                                                                                                                                                                                    | Introduction<br>PP: 6, 7                                                                                                                       |

|                |   |                                                                                                                                                                                                                                                                                                                                                            |  |                                                                                                                                                                                                                                                                                                                                                                                                  |                                                          |
|----------------|---|------------------------------------------------------------------------------------------------------------------------------------------------------------------------------------------------------------------------------------------------------------------------------------------------------------------------------------------------------------|--|--------------------------------------------------------------------------------------------------------------------------------------------------------------------------------------------------------------------------------------------------------------------------------------------------------------------------------------------------------------------------------------------------|----------------------------------------------------------|
| Objectives     | 3 | State specific objectives, including any pre-specified hypotheses                                                                                                                                                                                                                                                                                          |  |                                                                                                                                                                                                                                                                                                                                                                                                  | P: 7                                                     |
| <b>Methods</b> |   |                                                                                                                                                                                                                                                                                                                                                            |  |                                                                                                                                                                                                                                                                                                                                                                                                  |                                                          |
| Study Design   | 4 | Present key elements of study design early in the paper                                                                                                                                                                                                                                                                                                    |  |                                                                                                                                                                                                                                                                                                                                                                                                  | P: 8                                                     |
| Setting        | 5 | Describe the setting, locations, and relevant dates, including periods of recruitment, exposure, follow-up, and data collection                                                                                                                                                                                                                            |  |                                                                                                                                                                                                                                                                                                                                                                                                  | P: 8                                                     |
| Participants   | 6 | <p><i>(a) Cohort study</i> - Give the eligibility criteria, and the sources and methods of selection of participants. Describe methods of follow-up</p> <p><i>Case-control study</i> - Give the eligibility criteria, and the sources and methods of case ascertainment and control selection. Give the rationale for the choice of cases and controls</p> |  | <p>RECORD 6.1:<br/>The methods of study population selection (such as codes or algorithms used to identify subjects) should be listed in detail. If this is not possible, an explanation should be provided.</p> <p>RECORD 6.2:<br/>Any validation studies of the codes or algorithms used to select the population should be referenced. If validation was conducted for this study and not</p> | <p>Methods, Cohort Description<br/>P: 8</p> <p>P: 10</p> |



|                              |   |                                                                                                                                                                                                                                                                                                                                                                   |  |                                                                                                                                                                                                                                                                                                                    |               |
|------------------------------|---|-------------------------------------------------------------------------------------------------------------------------------------------------------------------------------------------------------------------------------------------------------------------------------------------------------------------------------------------------------------------|--|--------------------------------------------------------------------------------------------------------------------------------------------------------------------------------------------------------------------------------------------------------------------------------------------------------------------|---------------|
|                              |   | <p><i>Cross-sectional study</i> - Give the eligibility criteria, and the sources and methods of selection of participants</p> <p><i>(b) Cohort study</i> - For matched studies, give matching criteria and number of exposed and unexposed</p> <p><i>Case-control study</i> - For matched studies, give matching criteria and the number of controls per case</p> |  | <p>published elsewhere, detailed methods and results should be provided.</p> <p>RECORD 6.3: If the study involved linkage of databases, consider use of a flow diagram or other graphical display to demonstrate the data linkage process, including the number of individuals with linked data at each stage.</p> | N/A           |
| Variables                    | 7 | Clearly define all outcomes, exposures, predictors, potential confounders, and effect modifiers. Give diagnostic criteria, if applicable.                                                                                                                                                                                                                         |  | RECORD 7.1: A complete list of codes and algorithms used to classify exposures, outcomes, confounders, and effect modifiers should be provided. If these cannot be reported, an explanation should be provided.                                                                                                    | PP: 9, 10     |
| Data sources/<br>measurement | 8 | For each variable of interest, give sources of data and details of methods of                                                                                                                                                                                                                                                                                     |  |                                                                                                                                                                                                                                                                                                                    | PP: 9, 10, 11 |

|                        |    |                                                                                                                                                                                                                                                                             |  |                                                                                  |
|------------------------|----|-----------------------------------------------------------------------------------------------------------------------------------------------------------------------------------------------------------------------------------------------------------------------------|--|----------------------------------------------------------------------------------|
|                        |    | assessment (measurement). Describe comparability of assessment methods if there is more than one group                                                                                                                                                                      |  |                                                                                  |
| Bias                   | 9  | Describe any efforts to address potential sources of bias                                                                                                                                                                                                                   |  | P: 10 (Propensity matching addresses bias from observable covariate differences) |
| Study size             | 10 | Explain how the study size was arrived at                                                                                                                                                                                                                                   |  | P: 8                                                                             |
| Quantitative variables | 11 | Explain how quantitative variables were handled in the analyses. If applicable, describe which groupings were chosen, and why                                                                                                                                               |  | PP: 9, 10 and Appendix                                                           |
| Statistical methods    | 12 | (a) Describe all statistical methods, including those used to control for confounding<br>(b) Describe any methods used to examine subgroups and interactions<br>(c) Explain how missing data were addressed<br>(d) <i>Cohort study</i><br>- If applicable, explain how loss |  | PP: 10, 11, and Appendix                                                         |

|                                  |  |                                                                                                                                                                                                                                                                                                                |  |                                                                                                                                                                                                                                                                     |      |
|----------------------------------|--|----------------------------------------------------------------------------------------------------------------------------------------------------------------------------------------------------------------------------------------------------------------------------------------------------------------|--|---------------------------------------------------------------------------------------------------------------------------------------------------------------------------------------------------------------------------------------------------------------------|------|
|                                  |  | <p>to follow-up was addressed</p> <p><i>Case-control study</i> - If applicable, explain how matching of cases and controls was addressed</p> <p><i>Cross-sectional study</i> - If applicable, describe analytical methods taking account of sampling strategy</p> <p>(e) Describe any sensitivity analyses</p> |  |                                                                                                                                                                                                                                                                     |      |
| Data access and cleaning methods |  | ..                                                                                                                                                                                                                                                                                                             |  | <p>RECORD 12.1: Authors should describe the extent to which the investigators had access to the database population used to create the study population.</p> <p>RECORD 12.2: Authors should provide information on the data cleaning methods used in the study.</p> | P: 8 |
| Linkage                          |  | ..                                                                                                                                                                                                                                                                                                             |  | <p>RECORD 12.3: State whether the study included person-level, institutional-level, or other data</p>                                                                                                                                                               | N/A  |

|                  |    |                                                                                                                                                                                                                                                                                                                        |  |                                                                                                                                                                                                                                                                                                                    |                                |
|------------------|----|------------------------------------------------------------------------------------------------------------------------------------------------------------------------------------------------------------------------------------------------------------------------------------------------------------------------|--|--------------------------------------------------------------------------------------------------------------------------------------------------------------------------------------------------------------------------------------------------------------------------------------------------------------------|--------------------------------|
|                  |    |                                                                                                                                                                                                                                                                                                                        |  | linkage across two or more databases. The methods of linkage and methods of linkage quality evaluation should be provided.                                                                                                                                                                                         |                                |
| <b>Results</b>   |    |                                                                                                                                                                                                                                                                                                                        |  |                                                                                                                                                                                                                                                                                                                    |                                |
| Participants     | 13 | (a) Report the numbers of individuals at each stage of the study ( <i>e.g.</i> , numbers potentially eligible, examined for eligibility, confirmed eligible, included in the study, completing follow-up, and analysed)<br>(b) Give reasons for non-participation at each stage.<br>(c) Consider use of a flow diagram |  | RECORD 13.1: Describe in detail the selection of the persons included in the study ( <i>i.e.</i> , study population selection) including filtering based on data quality, data availability and linkage. The selection of included persons can be described in the text and/or by means of the study flow diagram. | Cohort Description<br>PP: 8, 9 |
| Descriptive data | 14 | (a) Give characteristics of study participants ( <i>e.g.</i> , demographic, clinical, social) and information on exposures and potential confounders<br>(b) Indicate the number of                                                                                                                                     |  |                                                                                                                                                                                                                                                                                                                    | PP: 8, 9                       |

|              |    |                                                                                                                                                                                                                                                                                                     |  |  |                                              |
|--------------|----|-----------------------------------------------------------------------------------------------------------------------------------------------------------------------------------------------------------------------------------------------------------------------------------------------------|--|--|----------------------------------------------|
|              |    | <p>participants with missing data for each variable of interest</p> <p>(c) <i>Cohort study</i> - summarise follow-up time (e.g., average and total amount)</p>                                                                                                                                      |  |  |                                              |
| Outcome data | 15 | <p><i>Cohort study</i> - Report numbers of outcome events or summary measures over time</p> <p><i>Case-control study</i> - Report numbers in each exposure category, or summary measures of exposure</p> <p><i>Cross-sectional study</i> - Report numbers of outcome events or summary measures</p> |  |  | Outcome indicators<br>PP: 8, 9               |
| Main results | 16 | <p>(a) Give unadjusted estimates and, if applicable, confounder-adjusted estimates and their precision (e.g., 95% confidence interval). Make clear which confounders were adjusted</p>                                                                                                              |  |  | Results<br>PP: 11-14<br>Supplemental Table 1 |

|                   |    |                                                                                                                                                                                                                                 |  |                                                                                                                                                                                                                                                                     |                                                                                 |
|-------------------|----|---------------------------------------------------------------------------------------------------------------------------------------------------------------------------------------------------------------------------------|--|---------------------------------------------------------------------------------------------------------------------------------------------------------------------------------------------------------------------------------------------------------------------|---------------------------------------------------------------------------------|
|                   |    | for and why they were included<br>(b) Report category boundaries when continuous variables were categorized<br>(c) If relevant, consider translating estimates of relative risk into absolute risk for a meaningful time period |  |                                                                                                                                                                                                                                                                     |                                                                                 |
| Other analyses    | 17 | Report other analyses done—e.g., analyses of subgroups and interactions, and sensitivity analyses                                                                                                                               |  |                                                                                                                                                                                                                                                                     | N/A                                                                             |
| <b>Discussion</b> |    |                                                                                                                                                                                                                                 |  |                                                                                                                                                                                                                                                                     |                                                                                 |
| Key results       | 18 | Summarise key results with reference to study objectives                                                                                                                                                                        |  |                                                                                                                                                                                                                                                                     | PP: 11-14                                                                       |
| Limitations       | 19 | Discuss limitations of the study, taking into account sources of potential bias or imprecision. Discuss both direction and magnitude of any potential bias                                                                      |  | RECORD 19.1: Discuss the implications of using data that were not created or collected to answer the specific research question(s). Include discussion of misclassification bias, unmeasured confounding, missing data, and changing eligibility over time, as they | Strength and Limitations of this study<br>P: 5<br><br>Limitations<br>PP: 16, 17 |

|                                                           |    |                                                                                                                                                                            |  |                                                                                                                                                          |            |
|-----------------------------------------------------------|----|----------------------------------------------------------------------------------------------------------------------------------------------------------------------------|--|----------------------------------------------------------------------------------------------------------------------------------------------------------|------------|
|                                                           |    |                                                                                                                                                                            |  | pertain to the study being reported.                                                                                                                     |            |
| Interpretation                                            | 20 | Give a cautious overall interpretation of results considering objectives, limitations, multiplicity of analyses, results from similar studies, and other relevant evidence |  |                                                                                                                                                          | PP: 15, 16 |
| Generalisability                                          | 21 | Discuss the generalisability (external validity) of the study results                                                                                                      |  |                                                                                                                                                          | PP: 16, 17 |
| <b>Other Information</b>                                  |    |                                                                                                                                                                            |  |                                                                                                                                                          |            |
| Funding                                                   | 22 | Give the source of funding and the role of the funders for the present study and, if applicable, for the original study on which the present article is based              |  |                                                                                                                                                          | P: 19      |
| Accessibility of protocol, raw data, and programming code |    | ..                                                                                                                                                                         |  | RECORD 22.1: Authors should provide information on how to access any supplemental information such as the study protocol, raw data, or programming code. | P: 19      |

1  
2  
3 \*Reference: Benchimol EI, Smeeth L, Guttman A, Harron K, Moher D, Petersen I, Sørensen  
4 HT, von Elm E, Langan SM, the RECORD Working Committee. The REporting of studies  
5 Conducted using Observational Routinely-collected health Data (RECORD) Statement. *PLoS*  
6 *Medicine* 2015; in press.

7  
8  
9 \*Checklist is protected under Creative Commons Attribution ([CC BY](#)) license.  
10  
11  
12  
13  
14  
15  
16  
17  
18  
19  
20  
21  
22  
23  
24  
25  
26  
27  
28  
29  
30  
31  
32  
33  
34  
35  
36  
37  
38  
39  
40  
41  
42  
43  
44  
45  
46  
47  
48  
49  
50  
51  
52  
53  
54  
55  
56  
57  
58  
59  
60
